# Supplementary material for: Genome-wide identification and expression profile analysis of SWEET genes in Chinese jujube
Source: PeerJ. 2023 Jan 17;11:e14704. doi: 10.7717/peerj.14704 (PMC9854374; doi:10.7717/peerj.14704)
Supplement: Supplemental Information 1 [file peerj-11-14704-s001.xlsx]

## Sheet: Sheet1
Supplementary File 1 Protein sequences of Chinese ZjSWEETs.
>ZjSWEET1 MRHLEQIRPTFIEISDSSSNPEQPIYIYSFTLTKPRWRNSELLLIMGGVSLESVIIFFGLLGNIMSGLLYLSPADVFWRILKRKSTEEFESIPYVSKLLNAYFWVYYGLIKPKSLLVATINIFGGVVEVIFLTIFLLYAPPRMKTRTAILVAVLDVGFPAAAILLTQFLLHGEKRIDVAGLFCVIFSMIAYASPLSAMKTVVLTNSVEYMPFFLSLIFFVNGGVWTIYAVLAKDLFVGIPNGTGFLLGTAQLILYGIYWKPKSQTPKQDVEDEEDQKRQPLINDSSNLNQKN
>ZjSWEET2 MDILHFFFGVCGNAAALFLFLSPTITFKRIVKNRSTEQFSGIPYVMTLLNCLLSAWYGLPFVSPNNILVSTINGTGAAIEFIYVMIFIIFAPKREKAKILGLLTFVLTVFGCVAFVSLFALHHNARKLFCGVAATVFSIIMYGSPLSIMRLVIKTKSVEFMPFFLSLFVFLCGTSWFIFGLLGRDPFVAVPNGFGSALGTMQLILYFIYRDRKGESKKPSSEETMEMGLSKPNHVKQQNPNPNPNPNKTQNGSI
>ZjSWEET3 MGDTCLRLSIGIMGNAASLLLYAAPIITFARIVRKKSIEEFSCVPYIIALLNCFLYTWYALPVVSYRWENFPIVTINGLGILLEFSFVFIYFWYSTSAKEKIKVAVSVMLVVIVFTTTALISAFVFHDHHHRKVFVGSVGVVASVAMYCSPLVVVKQVLVTKSVEFMPFYLSFFTFVSSVLWMAYGLLGHDLFLASPNMVGTPLGLFQIMLYCKYRKNKIIMEEPNKWDLEKNDEKSKQLHLVVDDNINSKS
>ZjSWEET4 MVSADAARTVVGIIGNIISLFLFLSPVPTFIRILKKRSVEQYSPAPYLATLINCMVWTLYGLPMVHPGSILVVTINGSGTAIECVYIILFFIFSDKKKRLKVSLVVLFEIVFVGALSLLVLTLAHTHKKRSLVVGMVCILFNIMMYASPLAVMKLVITTKSVEYMPFFLSLASFANGLAWTAYALIRFDLFITVPNGLGTLFGLAQLLLYAAYYKSTKRQMEARKTKEVDFSEIIVAGDQQVSKKTAAAAPTQIKSGPTTHENHGT
>ZjSWEET5 MCAGNVISFGLFISPVPTFYRIIKNKAVEEFKPDPYIATVLNCLFWIFYGMPFVHPNSILVITINSIGLVLELTYLTIFFIYATNKGRKKVVLWLGIEIVFYAGIILITLLTLHGTKKRSMMVGILCDIFNIMMYASPLTVMAKVIRTKSVKYMPFYLSLANFLNGCIWVIYALIEFDAYILISNGLGAISGLVQLILYAWFYRTTPKDDDDSFSKPNEVQLSSSNRA
>ZjSWEET6 MAIFATHNIGVLIFGILGNIVSFVVFLAPVPTFLRVIKKKSTEGFQSVPYVVALFSGMMWLYYASLKSDETLLITINSFGCVIETIYIAIYITYAPKQARVYCHFSISFIFIYYGGLQRVVIRTKSVEFMPFPLSFFLTLSAIMWLCYGVLLKDLYVALPNILGLVFGVLQMILYVVYKNKKIAIDQQLPQHKGDIINVVSDDKLSATGTTTVTTAEVQIICTSKNKETVEELDHDQIQHGVEEKNRNHHRNGKSMEDCYSIIEVQPAATVKCEA
>ZjSWEET7 MVSAHTARNIVGIVGNVISFGLFISPVPTFYRIIKKKDVEEFKPDPYIATVLNCLFWVFYGMPFVHPDSLLVLTINAVGLVLELIYLSIFFAYAPNKGRKKVALWLGIEFTFYAIIVLITLLTLHGSKKRSLLVGIICDVFNIIMYASPLTVMAKVIKTKSVEYMPFYLSLANFLNGSVWTAYALIKFDIYVLVSNGLGAISGAIQLLLYAWYYRATPKVDKDGVAKPTVQLSTTNNATPAV
>ZjSWEET8 MAVSLSFIVGIIGNIISILVFTSPIKTFLRVVKKKSTENYKGIPYVTTLLSTSLWTFYGLLKPGGLLIVTVNGAGAVLQFIYVTLFLIYAPKDKKIKTAKLVAILNVGFLGSVIVLTLLAIKENVKLTFVGILCAGLTNIYIYIYMHGPWFQIEMEKIKVMFLLTNGKNPMRGIYCAFARLFDLSILS
>ZjSWEET9 MVNTDAVRTVVGILGNVISFGLFLSPSPTISTIIKHKSVQDFKPDPYVATVLNCAMWVLYGLPMVHPDSILVITINGIGFVIEFIYVSIFFIYSSWANRRKILIILAIEAVFVTIIAVVTLNAFHNTDDRSMFVGILAIIFNVIMYASPLTVMRMVIKTKSVKYMPFFLSLANFCNGVVWVVYALLKFDQYILIPNALGTGSGLIQLILYATYYKTTQWDEDEKPRSEVQLSNA
>ZjSWEET10 MAAHHSLILAFGLLGNIISFMVYLAPIPTFHKVHKKKSTEGFQSLPYVVALFSSMLWIYYAILKQGATLLITINSVGCVIETVYIALFLFYAPKKSRIQTVKLLVLLIAFGYGFMVIMTMFLAKGEKRIQIIGWICLVFNLIVFAAPLCIMRKVIRTRSVEFMPFPLSFFLTLGAVMWFFYGLLLKDYNIAFPNVLGIIFGIVQMVLYIVYRNAKKILEEPKLQELSDHIIDVVKLSTMVCPELNPVVLQPNDVENDITVEDENLKEKIEETKEEVKELSVQV
>ZjSWEET11 MAIFATHNIGVLIFGILGNIVSFVVFLAPVPTFLRVIKKKSTEGFQSVPYVVALFSGMMWLYYASLKSDETLLITINSFGCVIETIYIAIYITYAPKQARLFTLRLLLLFNFGGFCLVLLLSHFLAEGPTRIKVLGWLNVVVAVSVFAAPLSIIRVVIRTKSVEFMPFPLSFFLTLSAIMWLCYGVLLKDLYVALPNILGLVFGVLQMILYVVYKNKKIAIDQQLPQHKGDIINVVSDDKLSATGTTTVTTAEVQIICTSKNKETVEELDHDQIQHGVEEKNRNHHRNGKSMEDCYSIIEVQPAATVKCEA
>ZjSWEET12 MNLFVSNSVYIFLKNAAGVAGNIFAIGLFVSPIHTFRRILRNRSTEQFSGLPYIYALLNCLICLWYGMPIISPDNLMVLTVNSAGAVFQLVYIILFISYAEKSQKVRMLVLLLAVFGLFAIIVGGSLQIIDFSMRRMVVGLLSCASLISMFASPLFIINLVIRTRSVEFMPFYLSLSTFLMSTSFLLYGLFNSDPFIFVPNGIGTVLGIVQLALYFYYHNSSQEDSREPLLVSYA
>ZjSWEET13 MLTGLSSIYAVCGDAAGIAGNLFAFVLFLSPLPTFRRIIRNQSTEQFSGLPYVYALLNCLICFWYGSPFVSPGVILVATVNSIGAFFQSIYLSIFILYAERAIKLRMTGLLLAAFALFAIIVFVSMRMFDVDERQIFVGYLSVVSLISMFASPLFIIELVIKTRSVEFMPFYLSLSTFLMSLSFSLYGMFKYDPFIYVPNGIGTVLGLVQLILYYYFSSSYGEDSEEFLIDSYA
>ZjSWEET14 MEGFHSLPHVVELFSSKLGIYCAILQQGRSPLISINSVGFVIETLYIALFLFYAPKKSRMQTILLVLFIAFGYGLMVILTLFLTKGQKRIQIVGWICLTVKLIVFAAPLCTMTLGAVIWFFYGLLLEDYKLALPNVVGFILGNFQMGLYIAYSNWKEISQNKPTVNPGLNQGVLQSNDSQANVIDIIEDDCL
>ZjSWEET15 MESLSFFVGVIGNIISVLMFLSPARTFWQIINQGSTEEFESLPYICTFLSSFLWVYYGITKPDGLLIATVNGFGVLVETVYIALFLFYAPAKMKVKTGILVGILDVSFLTAAILLTRLALKGDSRIDAIGILCAGLNIIMYGSPLSAMKTVVATKSVEYMPFLLSFFLFLNGGIWTLYAFLVQDLFLGVPNGAGFLLGTAQLILYAIYRNAKPSINSKNIISDGLLEEGLQHHQPLILPQSSI
>ZjSWEET16 MVNTDAVRTVVGILGNVISFGLFLSPSPTISTIIKHKSVQDFKPDPYVATVLNCAMWVLYGLPMVHPDSILVITINGIGFVIEFIYVSIFFIYSSWANRRKILIILAIEAVFVTIITVVTLNAFHNTDDRSMFVGILAIIFNVIMYASPLTVMRMVIKTKSVK
>ZjSWEET17 MAVLLFSFIASNLFLFPGRDSCSPYNASKSYILVFCVVFREDHMAGATFHKVYKKQSTEGFQSLPYVVELFGSMLSIYYAILKQEVLLDLIAINSVGSLIETLYIALFLFFAPKKSRMQTIHLVLLIALGYGLIVILTLFLANGQKRIQIVGWIYLIFHLIVFATPLFIMRKVIRTRSVEFMPFALSFLRMLGAITGFVYWLLLKDYKFASSIISFPFVSLQFFPGSKQFANVLGFIFGTVQMGLYMAYRNRKEILQEPMVNPGLNQTVLQPNDIDGNVINIIEDDNLLR
>ZjSWEET18 MAVMNLHHPWSFTFGILGNIVSFMVYLAPVTTFYRIYRKKSTEGFHSVPYLVALFSAMLWFYYALVKKDAMLLITINSFGCFIEIIYILIFIFYAPTDARKLTVKLLALMNIGTFSLILLVTQLAVRNEYRVPVLGWICVAISVSVFASPLSIVIPNILGFGLGLIQMVLYAIYKNYNKVVEDKNKLPEHAKNIVILSTIATSEVYPVDVHVDAQPDGNEADNNKDHEQNHDHQDQEKSMDQSPV
>ZjSWEET19 DIYTIIKKKTSEGFQSIPYVISLLSAMLLLYYGVLKTNALLIVTINSIGCAIEVTYLVIYLIYAPKKDKMFTLRLILLFNMVAYGLMMVVTIFLFKGSGRVNAVGWICAAFNLAVFAAPLSIMRRVIKTKSVKYMPFSLSFFLTLCAIAWFFYGIFVEDFFIAFPNVLGFLFGAAQMILYLVYKDSNKNDLKLKTKTMEMNPSSPTADKPKALSFDHGRRKSMEMKVYVEQDTI
