# Supplementary material for: Genome-wide identification and expression profile analysis of SWEET genes in Chinese jujube
Source: PeerJ. 2023 Jan 17;11:e14704. doi: 10.7717/peerj.14704 (PMC9854374; doi:10.7717/peerj.14704)
Supplement: Supplemental Information 2 [file peerj-11-14704-s002.xlsx]

## Sheet: Sheet1
Supplementary File 2 Coding sequences of Chinese Jujube ZjSWEETs.
>ZjSWEET1 ATGAGGCACCTGGAACAAATCAGACCAACTTTCATAGAGATCTCAGATTCAAGTTCCAATCCAGAACAACCTATATACATATATAGCTTTACTTTAACAAAACCCAGGTGGAGAAATTCTGAATTACTACTTATTATGGGAGGTGTCAGCTTGGAAAGTGTGATTATATTTTTTGGGTTGCTAGGTAATATTATGTCAGGGCTACTTTACCTCTCTCCTGCAGATGTTTTCTGGCGAATCTTGAAGCGAAAATCAACAGAAGAATTTGAGAGCATCCCTTATGTATCCAAGTTATTGAATGCATATTTTTGGGTTTACTATGGACTTATTAAGCCGAAGAGCCTGCTTGTTGCCACAATCAACATATTTGGTGGTGTTGTGGAGGTCAT…
>ZjSWEET2 ATGGATATTCTGCATTTCTTTTTCGGAGTCTGTGGAAATGCTGCTGCTTTGTTCCTCTTCTTGTCTCCAACGATAACATTCAAGAGGATCGTAAAGAACAGGTCCACAGAGCAATTTTCAGGCATTCCGTACGTGATGACTCTGCTGAATTGCCTTCTTTCAGCTTGGTATGGATTGCCTTTTGTATCCCCAAACAACATTTTGGTCTCAACGATCAACGGCACAGGTGCAGCCATCGAGTTCATATACGTGATGATCTTCATCATATTTGCACCAAAAAGGGAAAAGGCCAAAATTCTTGGCCTCCTAACGTTTGTACTCACTGTATTTGGATGTGTGGCTTTTGTGTCACTTTTTGCTCTGCACCATAACGCTAGGAAGTTGTTCTG…
>ZjSWEET3 ATGGGAGACACTTGTCTGCGCCTGTCGATTGGCATCATGGGGAATGCTGCGTCTTTGCTGCTCTACGCTGCTCCCATAATAACTTTCGCAAGGATTGTAAGGAAGAAAAGCATAGAGGAGTTTTCTTGTGTTCCGTACATCATTGCACTATTGAATTGTTTCCTTTATACTTGGTATGCATTGCCTGTTGTAAGCTACAGGTGGGAAAATTTCCCAATAGTTACTATCAATGGCCTCGGAATCCTCCTCGAGTTCTCTTTCGTTTTCATCTATTTCTGGTATAGTACTTCGGCTAAAGAGAAGATAAAGGTAGCTGTTTCTGTGATGCTTGTGGTCATAGTGTTCACCACCACTGCACTTATCTCTGCTTTCGTTTTCCATGACCACCA…
>ZjSWEET4 ATGGTTTCTGCTGATGCTGCACGAACCGTAGTTGGTATCATAGGAAACATCATCTCCCTTTTCTTGTTCTTGTCTCCAGTGCCAACTTTCATTCGGATATTGAAGAAAAGATCGGTGGAGCAATATTCACCAGCTCCATACCTAGCAACCTTAATAAACTGCATGGTATGGACCCTGTACGGACTGCCCATGGTTCACCCAGGAAGCATACTGGTTGTGACCATTAATGGCTCAGGGACCGCCATCGAGTGCGTCTACATCATCCTCTTCTTCATTTTCTCGGACAAGAAGAAGAGGCTCAAAGTGTCTCTGGTTGTGCTCTTTGAGATTGTATTCGTTGGTGCTCTGAGCCTTCTGGTTTTAACCCTTGCTCACACTCACAAAAAGAG…
>ZjSWEET5 ATGTGTGCAGGGAACGTAATATCCTTTGGACTCTTTATCTCCCCAGTTCCAACATTTTACAGAATCATTAAGAACAAGGCAGTGGAGGAGTTCAAACCAGATCCTTATATTGCAACAGTACTCAACTGTTTGTTCTGGATATTCTATGGCATGCCTTTTGTTCATCCTAATAGTATTCTTGTAATCACCATTAATAGCATTGGGCTAGTACTGGAGCTCACTTACTTAACCATTTTCTTCATCTATGCAACCAACAAAGGCAGGAAAAAGGTGGTCCTTTGGCTCGGCATTGAAATTGTTTTCTATGCTGGCATTATTCTGATAACTCTCTTGACACTCCATGGCACTAAAAAAAGGTCCATGATGGTTGGCATTTTATGTGATATCTT…
>ZjSWEET6 ATGGCTATCTTCGCAACTCATAATATTGGGGTCTTAATATTTGGTATTCTAGGCAATATCGTTTCCTTTGTGGTTTTCCTAGCACCGGTGCCAACATTTTTGAGGGTGATTAAGAAGAAATCAACAGAAGGTTTTCAATCGGTTCCCTATGTGGTGGCACTATTCAGTGGGATGATGTGGCTCTATTATGCATCCCTAAAGTCTGATGAGACCCTTCTCATCACTATCAACTCATTCGGTTGTGTCATTGAGACCATCTACATTGCCATTTATATCACCTATGCACCAAAACAAGCAAGGGTATACTGCCATTTCTCTATATCCTTTATATTTATATACTATGGTGGCTTGCAGAGAGTGGTTATACGAACAAAGAGCGTGGAGTTTAT…
>ZjSWEET7 ATGGTCAGCGCCCATACAGCGCGGAATATTGTAGGGATCGTAGGGAATGTTATTTCATTTGGCCTGTTTATTTCTCCGGTACCCACATTCTATAGAATCATAAAGAAGAAGGATGTGGAAGAGTTCAAGCCAGATCCATATATTGCAACAGTACTGAACTGCCTTTTTTGGGTGTTCTATGGTATGCCTTTTGTTCATCCTGATAGCCTTCTTGTGCTCACCATCAATGCTGTTGGGCTGGTTCTCGAACTCATTTACTTATCCATTTTTTTTGCTTACGCACCCAATAAAGGCCGGAAAAAGGTAGCGTTGTGGCTTGGCATTGAATTTACATTTTATGCCATCATTGTTCTGATAACGCTTTTGACATTGCACGGATCTAAAAAGAG…
>ZjSWEET8 ATGGCTGTTAGCTTAAGCTTCATAGTTGGCATTATTGGTAATATAATTTCTATTCTGGTTTTCACTTCTCCCATAAAAACTTTTTTGCGTGTGGTGAAGAAGAAATCAACGGAGAATTACAAAGGGATTCCATATGTGACAACACTTTTAAGCACAAGTTTATGGACATTTTATGGACTTCTAAAGCCTGGTGGTTTACTTATCGTGACTGTTAATGGTGCCGGTGCCGTCCTCCAGTTCATCTATGTCACTCTCTTTCTCATCTATGCTCCTAAAGATAAAAAGATTAAGACAGCGAAGTTGGTTGCGATACTGAATGTTGGGTTTCTTGGATCAGTGATTGTATTAACACTGCTTGCCATCAAAGAAAATGTAAAGCTTACCTTTGT…
>ZjSWEET9 ATGGTTAACACAGATGCCGTTAGAACAGTTGTAGGGATCCTAGGAAATGTGATCTCTTTCGGGTTATTTCTCTCCCCATCGCCAACAATTTCAACAATAATAAAGCATAAATCAGTACAAGATTTCAAGCCAGATCCATACGTAGCAACTGTACTGAATTGTGCAATGTGGGTACTGTATGGCCTTCCTATGGTCCATCCAGATAGTATTCTTGTCATAACTATCAACGGCATTGGTTTCGTTATCGAATTCATCTATGTTTCCATCTTCTTTATCTACTCATCATGGGCAAATCGACGAAAGATCCTCATTATTTTGGCGATTGAAGCTGTTTTTGTGACGATTATCGCTGTTGTTACGTTGAATGCTTTCCATAACACCGATGATCG…
>ZjSWEET10 ATGGCTGCTCACCACTCATTAATTTTGGCTTTTGGCCTCTTAGGCAACATTATCTCTTTTATGGTCTACCTTGCTCCAATCCCGACGTTTCACAAGGTGCACAAGAAAAAATCGACAGAAGGGTTTCAATCACTTCCTTATGTTGTTGCACTATTCAGTTCAATGTTGTGGATATACTATGCAATCCTTAAACAAGGAGCCACTCTTCTCATCACTATCAACTCAGTTGGATGTGTAATAGAGACCGTCTACATTGCCCTTTTCCTTTTTTATGCCCCTAAGAAATCCCGGATCCAAACAGTGAAACTTCTGGTCTTGCTGATTGCTTTTGGTTATGGATTTATGGTTATCATGACTATGTTCCTCGCAAAAGGTGAAAAGCGTATCC…
>ZjSWEET11 ATGGCTATCTTCGCAACTCATAATATTGGGGTCTTAATATTTGGTATTCTAGGCAATATCGTTTCCTTTGTGGTTTTCCTAGCACCGGTGCCAACATTTTTGAGGGTGATTAAGAAGAAATCAACAGAAGGTTTTCAATCGGTTCCCTATGTGGTGGCACTATTCAGTGGGATGATGTGGCTCTATTATGCATCCCTAAAGTCTGATGAGACCCTTCTCATCACTATCAACTCATTCGGTTGTGTCATTGAGACCATCTACATTGCCATTTATATCACCTATGCACCAAAACAAGCAAGGTTGTTCACCTTGAGGCTACTTCTCCTGTTCAATTTTGGGGGATTTTGCTTGGTTCTTCTTCTTTCCCACTTCTTAGCTGAAGGACCTA…
>ZjSWEET12 ATGAATCTTTTCGTTTCAAACTCTGTCTACATATTTTTGAAGAATGCAGCTGGAGTCGCCGGGAACATCTTTGCGATTGGGCTGTTTGTGTCGCCTATACACACATTTAGGAGAATACTTAGAAACCGTTCAACGGAGCAATTTTCAGGGTTGCCTTACATATATGCCCTCTTGAACTGCTTGATTTGCTTGTGGTATGGAATGCCTATCATATCTCCAGATAATCTAATGGTTCTGACGGTCAATTCAGCGGGTGCAGTTTTTCAATTAGTCTACATAATCCTCTTCATATCATATGCTGAGAAGTCACAAAAGGTGAGAATGCTGGTGTTGCTGCTGGCAGTTTTTGGCCTATTTGCAATCATAGTAGGTGGGAGCTTGCAAATAA…
>ZjSWEET13 ATGCTAACTGGGTTGTCTTCTATCTATGCAGTTTGCGGTGATGCAGCTGGAATTGCAGGGAACCTGTTTGCTTTTGTCTTGTTTCTGTCACCGCTACCAACATTCAGAAGAATTATCAGAAACCAGTCAACAGAACAATTCTCTGGGTTGCCTTATGTGTATGCCCTCTTGAACTGTTTGATATGCTTTTGGTATGGCAGTCCTTTTGTATCTCCTGGTGTCATACTAGTTGCCACAGTGAATTCAATTGGAGCATTTTTCCAATCAATCTACTTGAGCATTTTCATCTTATATGCTGAAAGAGCAATAAAGCTGAGGATGACAGGACTCCTTCTGGCAGCTTTTGCCCTTTTTGCAATCATAGTATTTGTTAGCATGAGAATGTTTG…
>ZjSWEET14 ATGGAAGGATTTCATTCACTTCCTCATGTTGTTGAACTATTCAGCTCAAAGTTGGGGATATACTGTGCAATCCTGCAACAAGGACGCTCTCCTCTCATCAGTATCAACTCAGTCGGATTTGTAATAGAGACACTCTACATTGCTCTTTTCCTATTTTATGCTCCCAAGAAGTCTCGGATGCAGACAATACTTCTAGTCTTGTTCATTGCTTTCGGTTACGGTTTGATGGTCATATTGACTCTATTCCTAACAAAAGGCCAGAAGCGTATCCAGATTGTGGGATGGATTTGTCTAACTGTTAAGCTTATTGTATTTGCTGCACCACTTTGCACAATGACACTTGGAGCTGTTATATGGTTCTTCTATGGCCTTTTGCTTGAGGATTACA…
>ZjSWEET15 ATGGAAAGCTTGAGTTTCTTTGTTGGGGTTATAGGCAACATCATCTCAGTGCTCATGTTTCTTTCTCCTGCGAGAACATTTTGGCAAATCATAAACCAGGGTTCAACGGAGGAGTTTGAGAGTCTTCCATATATTTGCACATTTTTAAGCTCATTCTTGTGGGTTTATTATGGGATCACAAAGCCTGATGGACTGCTTATAGCTACTGTTAATGGCTTCGGAGTCCTGGTTGAGACTGTCTATATTGCATTGTTTCTTTTCTATGCCCCAGCAAAGATGAAGGTAAAGACTGGAATCCTGGTAGGGATATTGGATGTGAGTTTTCTAACAGCAGCGATTTTGCTGACTCGGTTAGCTTTAAAGGGAGATTCACGTATTGATGCAATAG…
>ZjSWEET16 ATGGTTAACACAGATGCCGTTAGAACAGTTGTAGGGATCCTAGGAAATGTGATCTCTTTCGGGTTATTTCTCTCCCCATCGCCAACAATTTCAACAATAATAAAGCATAAATCAGTACAAGATTTCAAGCCAGATCCATACGTAGCAACTGTACTGAATTGTGCAATGTGGGTACTGTATGGCCTTCCTATGGTCCATCCAGATAGTATTCTTGTCATAACTATCAACGGCATTGGTTTCGTTATCGAATTCATCTATGTTTCCATCTTCTTTATCTACTCATCATGGGCAAATCGACGAAAGATCCTCATTATTTTGGCGATTGAAGCTGTTTTTGTGACGATTATCACTGTTGTTACGTTGAATGCTTTCCATAACACCGATGATC…
>ZjSWEET17 ATGGCTGTTCTTCTTTTCTCTTTTATTGCAAGCAACTTGTTTCTTTTTCCTGGCCGAGATTCTTGTTCTCCTTATAATGCATCGAAGAGTTACATTTTAGTATTTTGTGTTGTGTTTAGAGAAGATCATATGGCCGGTGCAACATTTCACAAAGTATACAAGAAACAATCTACAGAAGGATTTCAATCACTTCCTTATGTTGTTGAACTATTCGGTTCAATGTTGTCAATATATTATGCAATCCTTAAACAAGAAGTACTTCTTGATCTCATCGCTATCAACTCAGTTGGAAGTTTAATAGAGACTCTCTACATTGCCCTTTTCCTATTTTTTGCGCCCAAGAAGTCAAGGATGCAGACAATACATCTAGTCTTGTTGATTGCTCTTG…
>ZjSWEET18 ATGGCTGTAATGAACCTCCACCATCCTTGGTCATTTACATTTGGAATCTTAGGTAACATTGTTTCTTTCATGGTGTACTTAGCTCCAGTAACAACTTTTTACCGGATATACAGAAAAAAATCAACAGAAGGTTTCCATTCGGTGCCTTATCTTGTAGCCTTGTTCAGTGCCATGCTTTGGTTCTATTACGCACTAGTGAAGAAAGATGCTATGCTTCTAATAACCATTAACTCTTTCGGATGCTTCATAGAGATAATCTACATCCTCATCTTCATCTTTTATGCCCCAACAGATGCCAGGAAATTAACAGTCAAATTATTAGCTCTAATGAACATCGGAACCTTCTCCTTGATCCTTCTTGTAACACAATTAGCTGTAAGAAATGAAT…
>ZjSWEET19 GATATTTATACAATAATAAAGAAGAAAACATCAGAAGGGTTCCAATCAATTCCTTATGTAATATCACTTCTGAGTGCAATGTTGTTGTTGTATTATGGTGTCCTCAAGACTAATGCTTTGCTCATTGTCACCATCAATTCCATTGGCTGTGCTATTGAAGTTACTTACCTCGTCATCTACTTGATATATGCACCAAAGAAGGACAAGATGTTTACTTTGAGGTTGATACTGCTCTTCAATATGGTAGCCTACGGCTTGATGATGGTTGTCACTATCTTCCTTTTCAAAGGTTCTGGCCGCGTTAATGCCGTTGGATGGATTTGTGCTGCTTTTAACCTTGCTGTCTTTGCTGCTCCTTTAAGTATCATGAGGCGAGTCATTAAAACTA…
