# Supplementary material for: Genome-wide identification and expression profile analysis of SWEET genes in Chinese jujube
Source: PeerJ. 2023 Jan 17;11:e14704. doi: 10.7717/peerj.14704 (PMC9854374; doi:10.7717/peerj.14704)
Supplement: Supplemental Information 4 [file peerj-11-14704-s004.xlsx]

## Sheet: Sheet1
Supplementary File 4 Protein sequences of AtSWEETs and MdSWEETs.
> AtSWEET1 MNIAHTIFGVFGNATALFLFLAPSITFKRIIKNKSTEQFSGIPYPMTLLNCLLSAWYGLPFVSKDNTLVSTINGTGAVIETVYVLIFLFYAPKKEKIKIFGIFSCVLAVFATVALVSLFALQGNGRKLFCGLAATVFSIIMYASPLSIMRLVVKTKSVEFMPFFLSLFVFLCGTSWFVYGLIGRDPFVAIPNGFGCALGTLQLILYFIYCGNKGEKSADAQKDEKSVEMKDDEKKQNVVNGKQDLQV
>AtSWEET2 MDVFAFNASLSMCKDVAGIAGNIFAFGLFVSPMPTFRRIMRNKSTEQFSGLPYIYALLNCLICLWYGTPFISHSNAMLMTVNSVGATFQLCYIILFIMHTDKKNKMKMLGLLFVVFAVVGVIVAGSLQIPDQLTRWYFVGFLSCGSLVSMFASPLFVINLVIRTKSVEFMPFYLSLSTFLMSASFLLYGLFNSDAFVYTPNGIGTILGIVQLALYCYYHRNSIEEETKEPLIVSYV
> AtSWEET3 MGDKLRLSIGILGNGASLLLYTAPIVTFSRVFKKKSTEEFSCFPYVMTLFNCLIYTWYGLPIVSHLWENLPLVTINGVGILLESIFIFIYFYYASPKEKIKVGVTFVPVIVGFGLTTAISALVFDDHRHRKSFVGSVGLVASISMYGSPLVVMKKVIETRSVEYMPFYLSFFSFLASSLWLAYGLLSHDLFLASPNMVATPLGILQLILYFKYKNKKDLAPTTMVITKRNDHDDKNKATLEFVVDVDRNSDTNEKNSNNASSI
> AtSWEET4 MVNATVARNIAGICGNVISLFLFLSPIPTFITIYKKKKVEEYKADPYLATVLNCALWVFYGLPMVQPDSLLVITINGTGLAIELVYLAIFFFFSPTSRKVKVGLWLIGEMVFVGIVATCTLLLFHTHNQRSSFVGIFCVIFVSLMYIAPLTIMSKVIKTKSVKYMPFSLSLANFLNGVVWVIYALIKFDLFILIGNGLGTVSGAVQLILYACYYKTTPKDDEDEEDEENLSKVNSQLQLSGNSGQAKRVSA
>AtSWEET5 MTDPHTARTIVGIVGNVISFGLFCAPIPTMVKIWKMKSVSEFKPDPYVATVLNCMMWTFYGLPFVQPDSL LVITINGTGLFMELVYVTIFFVFATSPVRRKITIAMVIEVIFMAVVIFCTMYFLHTTKQRSMLIGILCIV FNVIMYAAPLTVMKLVIKTKSVKYMPFFLSLANFMNGVVWVIYACLKFDPYILIPNGLGSLSGIIQLIIY ITYYKTTNWNDDDEDKEKRYSNAGIELGQA
>AtSWEET6 MVHEQLNLIRKIVGILGNFISLCLFLSPTPTFIHIVKKKSVEKYSPLPYLATLLNCLVRALYGLPMVHPDSTLLVTISGIGITIEIVFLTIFFVFCGRQQHRLVISAVLTVQVVFVATLAVLVLTLEHTTDQRTISVGIVSCVFNAMMYASPLSVMKMVIKTKSLEFMPFLLSVVGFLNAGVWTIYGFVPFDPFLAIPNGIGCVFGLVQLILYGTYYKSTKGIMEERKNRLGYVGEVGLSNAIAQTEPENIPYLNKRVSGV
>AtSWEET7 MVFAHLNLLRKIVGIIGNFIALCLFLSPTPTFVRIVKKKSVEEYSPIPYLATLINCLVWVLYGLPTVHPDSTLVITINGTGILIEIVFLTIFFVYCGRQKQRLIISAVIAAETAFIAILAVLVLTLQHTTEKRTMSVGIVCCVFNVMMYASPLSVMKMVIKTKSVEFMPFWLSVAGFLNAGVWTIYALMPFDPFMAIPNGIGCLFGLAQLILYGAYYKSTKRIMAERENQPGYVGLSSAIARTGSEKTANTNQEPNNV
>AtSWEET8 MVDAKQVRFIIGVIGNVISFGLFAAPAKTFWRIFKKKSVEEFSYVPYVATVMNCMLWVFYGLPVVHKDSILVSTINGVGLVIELFYVGVYLMYCGHKKNHRRNILGFLALEVILVVAIILITLFALKGDFVKQTFVGVICDVFNIAMYGAPSLAIIKVVKTKSVEYMPFLLSLVCFVNAGIWTTYSLIFKIDYYVLASNGIGTFLALSQLIVYFMYYKSTPKEKTVKPSEVEISATERV
>AtSWEET9 MFLKVHEIAFLFGLLGNIVSFGVFLSPVPTFYGIYKKKSSKGFQSIPYICALASATLLLYYGIMKTHAYLIISINTFGCFIEISYLFLYILYAPREAKISTLKLIVICNIGGLGLLILLVNLLVPKQHRVSTVGWVCAAYSLAVFASPLSVMRKVIKTKSVEYMPFLLSLSLTLNAVMWFFYGLLIKDKFIAMPNILGFLFGVAQMILYMMYQGSTKTDLPTENQLANKTDVNEVPIVAVELPDVGSDNVEGSVRPMK
>AtSWEET10 MAISQAVLATVFGILGNIISFFVCLAPIPTFVRIYKRKSSEGYQSIPYVISLFSAMLWMYYAMIKKDAMMLITINSFAFVVQIVYISLFFFYAPKKEKTLTVKFVLFVDVLGFGAIFVLTYFIIHANKRVQVLGYICMVFALSVFVAPLGIIRKVIKTKSAEFMPFGLSFFLTLSAVMWFFYGLLLKDMNIALPNVLGFIFGVLQMILFLIYKKPGTKVLEPPGIKLQDISEHVVDVVRLSTMVCNSQMRTLVPQDSADMEATIDIDEKIKGDIEKNKDEKEVFLISKN
>AtSWEET11 MSLFNTENTWAFVFGLLGNLISFAVFLSPVPTFYRIWKKKTTEGFQSIPYVVALFSATLWLYYATQKKDVFLLVTINAFGCFIETIYISMFLAYAPKPARMLTVKMLLLMNFGGFCAILLLCQFLVKGATRAKIIGGICVGFSVCVFAAPLSIIRTVIKTRSVEYMPFSLSLTLTISAVIWLLYGLALKDIYVAFPNVLGFALGALQMILYVVYKYCKTSPHLGEKEVEAAKLPEVSLDMLKLGTVSSPEPISVVRQANKCTCGNDRRAEIEDGQTPKHGKQSSSAAAT
>AtSWEET12 MALFDTHNTWAFVFGLLGNLISFAVFLSPVPTFYRICKKKTTEGFQSIPYVVALFSAMLWLYYATQKKDVFLLVTINSFGCFIETIYISIFVAFASKKARMLTVKLLLLMNFGGFCLILLLCQFLAKGTTRAKIIGGICVGFSVCVFAAPLSIIRTVIKTKSVEYMPFSLSLTLTISAVIWLLYGLALKDIYVAFPNVIGFVLGALQMILYVVYKYCKTPSDLVEKELEAAKLPEVSIDMVKLGTLTSPEPVAITVVRSVNTCNCNDRNAEIENGQGVRNSAATT
>AtSWEET13 MALTNNLWAFVFGILGNIISFVVFLAPVPTFVRICKKKSTEGFQSLPYVSALFSAMLWIYYAMQKDGTAFLLITINAFGCVIETIYIVLFVSYANKKTRISTLKVLGLLNFLGFAAIVLVCELLTKGSTREKVLGGICVGFSVSVFAAPLSIMRVVVRTRSVEFMPFSLSLFLTISAVTWLFYGLAIKDFYVALPNVLGAFLGAVQMILYIIFKYYKTPVAQKTDKSKDVSDHSIDIAKLTTVIPGAVLDSAVHQPPALHNVPETKIQLTEVKSQNMTDP
>AtSWEET14 MVLTHNVLAVTFGVLGNIISFIVFLAPVPTFVRICKKKSIEGFESLPYVSALFSAMLWIYYALQKDGAGFLLITINAVGCFIETIYIILFITYANKKARISTLKVLGLLNFLGFAAIILVCELLTKGSNREKVLGGICVGFSVCVFAAPLSIMRVVIRTKSVEFMPFSLSLFLTISAITWLFYGLAIKDFYVALPNILGAFLGAVQMILYVIFKYYKTPLVVDETEKPKTVSDHSINMVKLSSTPASGDLTVQPQTNPDVSHPIKTHGGDLEDQMDKKMPN
>AtSWEET15 MGVMINHHFLAFIFGILGNVISFLVFLAPVPTFYRIYKRKSTESFQSLPYQVSLFSCMLWLYYALIKKDAFLLITINSFGCVVETLYIAMFFAYATREKRISAMKLFIAMNVAFFSLILMVTHFVVKTPPLQVSVLGWICVAISVSVFAAPLMIVARVIKTKSVEYMPFTLSFFLTISAVMWFAYGLFLNDICIAIPNVVGFVLGLLQMVLYLVYRNSNEKPEKINSSEQQLKSIVVMSPLGVSEVHPVVTESVDPLSEAVHHEDLSKVTKVEEPSIENGKCYVEATRPETV
>AtSWEET16 MWTGQTQSSVLIICYLSHPISSLSLSTFLRNPSSEMADLSFYVGVIGNVISVLVFLSPVETFWRIVQRRSTEEYECFPYICTLMSSSLWTYYGIVTPGEYLVSTVNGFGALAESIYVLIFLFFVPKSRFLKTVVVVLALNVCFPVIAIAGTRTLFGDANSRSSSMGFICATLNIIMYGSPLSAIKTVVTTRSVQFMPFWLSFFLFLNGAIWGVYALLLHDMFLLVPNGMGFFLGIMQLLIYAYYRNAEPIVEDEEGLIPNQPLLA
>AtSWEET17 MAEASFYIGVIGNVISVLVFLSPVETFWKIVKRRSTEEYKSLPYICTLLGSSLWTYYGIVTPGEYLVSTVNGFGALVETIYVSLFLFYAPRHLKLKTVDVEAMLNVFFPIAAIVATRSAFEDEKMRSQSIGFISAGLNIIMYGSPLSAMKTVVTTKSVKYMPFWLSFFLFLNGAIWAVYALLQHDVFLLVPNGVGFVFGTMQLILYGIYRNAKPVGLSNGLSEIAQDEEEGLTSRVEPLLS
>MdSWEET1.1 VELELELKGLMVFSPSNPVFIICKGAAGIAGNIFAFGLFVSPIHTFRRIMRNRATEEFSGLPYIYALLNCLISMWYGSPIISPDNIMVMTVNSVGAVFQLVYITLFIIYAERTKKMRMLGLLAAVCGLIAIIVYGSLQIPDAALRRLVVGLLSCASLISMFASPLFIINLVIRTKSVEFMPFYLSLSTFLMSTSFLLYGIFNFDLFVYVPNGVGTILGIVQLALYFHYKDSSKGNSREPLLVSYA
>MdSWEET1.2 MCLLSNXSSLLFSETWAALXXFQYLRERERERRSVELELELELKGLMVFSPSNPVFIICKGAAGIAGNIFAFGLFVSPIHTFRRIMRNRATEEFSGLPYIYALLNCLISMWYGSPIISPDNIMVMTVNSVGAVFQLVYITLFIIYAERTKKMRMLGLLAAVCGLIAIIVYGSLQIPDAALRRLVVGLLSCASLISMFASPLFIINLVIRTKSVEFMPFYLSLSTFLMSTSFLLYGIFNFDLFVYVPNGVGTILGIVQLALYFHYKDSSKGNSREPLLVSYA
>MdSWEET1.4 MLPIGLSSVYLWFSTAAGIAGNICAISLYVSPMPTFKRIITNKSTEQFSGLPYIYGLLNCLICTWYGLPIVKSGIIMVATVNSIGAVFQLVYLIIFITYAEKSIKLRISGLLAAVSVLFAAVVLVSLRLVAHERELFVGYLCAFSVVSVYASPLFIINLVIKTRSVEFMPFNLSLATFLVSFSFCAYGALQGDPFVYIPNGLGTILGFVQLVLYSYYSKMSGDDDSREPLLA
>MdSWEET1.5 MVVDMLPIGLSSVYLWCSTAAGIAGNICAISLYLSPMPTFKRIITNRSTEQFSGLPYIYGLLNCLICTWYGLPIVKSGIIMVATVNSIGAVFQLVYLIIFIMYAEKSIKLRISGLLGIVSVLFAAVVLVSLRLSGHERELFVGYICAFSVVSVYASPLFIINLVIKTRSVEFMPFNLSLATFLIPNGLGTILGFVQLVLYSYYSKISGDDDSREPLLV
>MdSWEET1.6 MDPKTMHVFKVFFGVIGNGTALFLFLAPTITFRRIIRKRSTEQFSGIPYVMTMLNCLLSAWYGLPFVSPNNILVSTINGTGAAIELIYVLIFIIFAPKRERAKILGLFTAVLALFSAVALVSLFTLHDKTRKLFCGLAATVFSVIMYSSPFSIMSTVVRTKSVEFMPFFLSLFSFLCGTSWFIFGLLGHDPFVAIPNGFGSGLGALQLLLYFIYRDNKGKGSGTKKPNGAATTADESMEMGVAKPDQQPKQSITINGAQDGHV
>MdSWEET1.9 MHVFKVLFGVLGNGTAFFLFLSPTITFKRIMRKKCTEQFSGIPYVMTMLNCLLYAWYGLPFVSANNFLVSTVNGTGAAMELIYVLVFIIFAPKREKAKILGLFTAVLALFSAVALVSLFALHDKTRKLFCGLAATVFAIIMFSSPLSIMSTVVRTKSVEFMPFFLSLFSFLCGTSWFIYGLLGRDPFVAIPNGCGSGLGALQLILYFIYRDNKGKGSGTTKPNGAATTADESITINGAQDGHV
>MdSWEET1.10 MHVFKVLFGVLGNGTAFFLFLSPTITFKRIIRKKCTEQFSGIPYVMTMLNCLLYTWYGLPFVSANNFLVSTVNGTGAAMELIYVLVFIIFAPKREKAKILGLFTAVLALFSAVALVSLFALHDKTRKLFCGLAATVFAIIMFSSPLSIMSTVVRTKSVEFMPFFLSLFSFLCGTSWFIYGLLGRDPFVAIPNGCGSGLGALQLILYFIYRDNKGKGSGTTKPNGAATTADESITINGAQDGHV
>MdSWEET1.12 MCRITFKRIMRKKCTEQFSGIPYVMTMLNCLLYAWYGLPFVSANNFLVSTVNGTGAAMELIYVLVFIIFAPKRERAKILGLFTAVLALFSAVALVSLFALHDKTRKLFCGLAATVFAIIMFSSPLSIMSTVVRTKSVEFMPFFLSLFSFLCGTSWFIYGLLGRDPFVAIPNGCGSGLGALQLILYFIYRDNKGKGSGTTKPNGAATTADESITINGAQDGHV
>MdSWEET1.13 MLRLVIGVMGNAAALLLFAAPTLTMSRIVRKKSTEGFSCVPYVTTLLNCLLYTWYGLPVIKVTATVIPAIVVFCITAIISAXVFHDHQHRKVFVGSVAIVASVSMYASPLVVVKQVILTKNVEYMPFYVSLFSFISSSLWMAYGLLSHDIFVASPNLVGTPLSILQLVLYCKYRKXGTVELPNKRDPEGNKVNDEKTIQLQVVICDTENGKN
>MdSWEET2.2 MVDIGLVRTVIGIIGNIISLIMFLSPIPTFYRIVKQKTVSDFKPDPYVVTLLNCALWVFYGMPFVHPDSILVVSINGAGVVIELVYILVFLIFSLGSQRLTIFKALVVEVIFFVIVVLVTMYIFHTTRHRSLVVGIICIIFNILMYLSPLTVMRMVIKTKSVKYMPFYLSLANFFNGVVWLVYSLLKFDANILLPNGLGTISGAVQLILYAIFYRTTRWEDDENDRPRSEVQVSNV
>MdSWEET2.3 MVDTGLXRTIIGIIDKRPADIARIMWKKYIGNALYILIKLPTFYRIVKQKAVSDFKPDPYVVTLLNCALWLFYGMPFVHPDSILVITINGIGFVTELAYIFVFLIFSPGSQRLKVFIALVVEVVFFVIVVFVTMYVFSTTKERSLVVGIICIVFNILMYVSPLTVMGIVIKTKSVKYMPFYLSLANFFNGVIWLVYSLLKLDINILIPNGLGTISGALQLILYAAFYKTTRWEDDVDVRPRSEVQVSNV
>MdSWEET2.4 MVSADAIRTXVGIIGNVISLILFLSPVQTFVRIWKKGSVEQYSPVPYLATLFNCMAWALYGLPVVHPNSLLVVTINGSAIFIELSYIILFLIYSSDKKQRLKVLLVLLLELVFMALLAFLVIKLAHTHKKRSLIVGLVCILGNIMMYASPLSVMKLVITTKSVEYMPFFLSLFSFFNSIAWFTYALIRFDIFLTIPNGLGLLFGSAQLLLYATXYKNTKRLMAERKSRQLSLTEVVSDRDEPKKISRTNHNGRAPSQNNGA
>MdSWEET3.1 MQFLNTEQLAFVFGLLGNIVSFMVFLAPIPTFYTIYKKKSSKGFQSIPYVVALLSATLLLYYGVLKTNAYLIVSINVIGIXIEVTYLILYIVYASKKDKITTLSLILLVNVAAFGLVLAVTVFLLGGTARVCAVGWICAVFNIAVFAAPLSIMRQVIRTKSVEFMPFSLSLFLTLCATMWFFYGLFTKDYYIALPNVLGFLFGIAQMILYMTYKNSGKDVEVKKSTMEMKKLSSTNRPNLTGSVNKNSRSDELKQTTDVYESNDEHVX
>MdSWEET3.3 MAAPDAPLLASVFGILGNIVSFMVLLAPLPTFYRIFKKKSTEGFQSIPYAVALFSAMLMLYYAFLKGHAFMLITINSIACVIETSYLVIYMIYAPAKIRIYTAKLLTLFNVGAYGVILFATSLITDPYLRIKIVGWTNVVFSVCVFAAPLSIMRLVIKTRSVEYMSFPLSFCLTLCAVMWFFYGLLLRDLFVAAPNILGFGFGIAQMIMYLVFKKSKKAVLPQYILKEIPNENGVAENDNQLKEEDTNDSKVEDVCSESMTSKVEDARSESMTSKVEDARLESMTSKXEDATTEQNESVV
>MdSWEET3.4 MALQHTLSLAFGLLGNIISLLVFLAPVPTFYTIYKKKTTEGFQALPYVIGLLSSMLYIYYALLKEEIKYDATLLITINSVGSVIETLYISLFLFYAPKKARISNATLLFLLNGFSYAVMVVLTRFLATGEMRIKIVGWICLVFSISVFVAPLGVLRQVXRTKSVEFMPFPLSFFLTLGAVAWFFYGFLIKDFYIALPNILGFFLGVVQMVVYIVYKNAKEVLEDQPKGQELSEHIIDVRKISTLVCPEMSPAVILQPTVDITSDMNEVVQNIIIMAEKTEETKEAAMDDDASTKV
>MdSWEET3.5 MALHHTLSLAFGLLGNIISLLVFLAPVPTFYTVYKKKTTEGFQALPYVIGLLSSMMYVYYALLKEEXKEDATLVITINSVGCVIETIYIXLFLFYAPKKARISTATLLFLLNLFSYGMMVVLTRFLATGETRFKIVGWICLVFSLSVFVAPLGVLRQVIRTKSVEFMPFPLSFFLTLGAVAWFFYGFLIKDYYIAFPNILGFFFGVVQMAVYVVYKNAKKFLEDQPKVQELSEHIIDVMKISTLVCPELSPAVILNPTVDITNDMIEVVQNIIVMAEKTEKTKEAAIDDDFSTKV
>MdSWEET3.7 MTASTSHHPLAFAFGILGNIVSFIVFLAPLPTFWRVYKKKSTEGFQSVPYVFALFSAMIWIYYAFLKSHVILLITINSFGCVIETIYIAIYLTYATKHARVSTLRLLLLVNFGGFCLILLLSHFLSQGPTRVEVLGWVCVTFSVSVFAAPLSVMRMVIRTKSVEFMPFNLSFFLTLSAVMWLCYGLLLKDLYVATPNILGFSFGVVQMALYAKYRNTKTIVEEKLPEHKADVVKQIKILTTTPEVEVXXXXXXXXSDTNSTDAHQNSERGTDQYVHAQTCRNEKIIEPSMPGQLVTCEV
>MdSWEET3.10 MAIVADSHHPLAFTFGILGNLISTMVYLSPVPTFYRIYRKKSTEGFHSVPYLVALFSSMLWLYYALVKKNAMMLITINSFGSFVEIIYIVMFXVYAPKEARKLTVKLFGIMNVGLFTMILVVSHFLVGSAYRVPILGWINVAISTSVFVAPLSIVAQVIRTRSVEFMPFGLSFFLTLSAVIWFAYGYLLKDICVAIPNFLGFVLGLLQMLLYGIYRNREQVIIDDHEKKLPGAIHEDVKNIVIIATLAASEVHPVDDQPNNRNNDTDVNNNAAVRDAKEXEQTDDHRHVENASVELQPNETSYAV
>MdSWEET3.11 MAIVADSHHPLAFTFGILGNLISTMVYLSPVPTFYRIYRKKSTEGFHSVPYLVALFSSMLWLYYALVKKNAMMLITINSFGSFVEIIYIVMFXVYAPKEARKLTVKLFGIMNVGLFTMILVVSHFLVGSAYRVPILGWINVAISTSVFVAPLSIVAQVIRTRSVEFMPFGLSFFLTLSAVIWFAYGYLLKDICVAIPNFLGFVLGLLQMLLYGIYRNREQVIIDDHEKKLPGAIHEDVKNIVIIATLAASEVHPVDDQPNNRNNDTDVNNNAAVRDAKEXEQTDDHRHVENASVELQPNETSYAV
>MdSWEET4.1 NQLRGPSNSINMEGLSFFVGVIGNIISVLMFLAPVPTFWRIVKHRSTEDFESLPYVCTLLNSSLWTYYGIIKSGELLVATINGFGATVEIIYLCLFLKYAPAKMRVKTVILIGTLDVGFLAVAILATWLALVGDTRIDAIGFICAGLNIIMYASPLVVMKTVVTTKSVEYMPFFLSFFFFINGGVWTFYAWLLQDVFLGVPNGIGFLLGTTQLVLYAIYRNAKPSNQISDGEQLEEGREHEPLLSSSDATX
