# Supplementary material for: Genome-wide identification and expression profile analysis of SWEET genes in Chinese jujube
Source: PeerJ. 2023 Jan 17;11:e14704. doi: 10.7717/peerj.14704 (PMC9854374; doi:10.7717/peerj.14704)
Supplement: Supplemental Information 5 [file peerj-11-14704-s005.xlsx]

## Sheet: Sheet1
Supplementary File 4 The sequence of 2 kb upstream of the ZjSWEET genes
>ZjSWEET1 AATGAGGAATTATGTATTATGGAATTCATTGCTAATTATCTCTATTTGCCGAATAATCAACAGAGACAATGTTCCATTGAGTATACAAACAAATTAAAGAGTGCAATTAATGCATTTGCCGATAATTTGCCAAAGTTAAGTGATTGGGTTCCGACGTGAGATATCACAATTAATTTGGAATGGTCTTCCACTTTGTTTTATTATTCCTCTCGCAAGGGGGGATGGTTTGGTTGGAATGGTTAAGTTTATTTAATTAGGAACATGTATTTAAATATCTTTGGAATAACTAAGCTTTTAATTATATAAAAAAAAGATTATCAAAAATATAAATATTACTAATTCAGTTTGTGACTAATATTTTAACTTTAAGGGTACCAAAATATTTATCA…
>ZjSWEET2 GAATCATCACATAGCTAGGAGAATTCCTTAAATGATGAGTACATTTATGTCATAAGTGCTCAAGATTACCATAATTAACACATAGAAAAGCAGCTCAGCAAAGAGGATAAATTTCTTTGACATACGCCACTTTCTAATCAAATTCACGTACTTACAAAATTGTCACTTCTATGAAACGACAAAAGTTCACTGATAGCCGCAAGAATTCAGGCAATATACTTTACTCCCAATTTAGGAATACAAAAAGTCCATGAGTTGGCACTTTTGCAAATAAATTAATCAAGTTCTTTATTCAAAAAGAAAAATAAAATAAAATTCCAAAGCTTATATTATATATATATATATATATTGTATAATATATACAACATTATTATGTATGAATTTATGAT…
>ZjSWEET3 TAAGACATAAGCTTGCTAGAATGCCATGTCTTGAAATGATAGAGACCAGTCGCGGAACATCAAAAATCTTGATCAACAAATTAAACCACACGCGTTTCAAGAACACCTCTAAATTCCTATTCAATTCTATTCTTCATCAATGACTATCAAATGTGCAGTTAACAATTGCTGTGTTGTTTCACACGATAAGGATTCTCTATACTATTCTTATTTTATTATTATTATTATTATTAATTTTTTTTTTTGGGTGAAAAAATGGGAATATGTTCTGAATGCACACAAACCATATGTTTTTGGAAACGCTAGAAAATATTTCGTACATTAATCTTGCATTGGGAATTTGTATAACCTCGGCCCCGGCTGATTATCAAGTTGCTCTTGAATCTACC…
>ZjSWEET4 CAACATTTAGAATTTTGCATTTTAGATCCTTAATTTTTTGATTTAACAATTTAAGTTATTGATTTTTTAATTTATTGAAATTTACATTTTATTTGACTTTTGATTATGAGGTTTAATGACCAACTCATATAATTAATGTTAAATTGTATCAATTTTCATATTAAAATATAATAAAGTATAAAATATTAACCTATTTTAAAAATTTTGCATTTTTCGTTTCCTTTATTTGTTTAAAAAAAGTTGATCAAGGTCATTCACTTGGTTTTTAAACTGTATTAAATTTCAAACTATAAGATATCAAAATTGTAAATTTTTAATTTGGTTTTTTAAAACTTTGCACTTTTGTATTTTTATTACTAGAAGTTTGATGTAGTAATACTAGTTAAGGA…
>ZjSWEET5 AGTCAAATCACAGTTATGACACAAAAACAAAAGAAAAATTACTGCAAAATAATAATAATAATAATAAAATAAAAATAAAAAAAGCAAAGGGATTATAGAAAAACCAGGAAATCTACTAGGATTCCAGCAAAGTCACGCAAAGGCTACCTTTCTTTCTGAACTTTTTTGCTTTGTTTGGTCTGAGAAAACAGCAAAGAAACTGTTACTATAGCAACAAAGCAAAACTTCAAGGTGTTCTAAGCCAAAATGCAGAGAAAAAACTGCTTCTCTTTCGTTGATAACGAAAAGAAAAGAGTAATGCAGACAAAATGATGAAATAGTATAAGAAAAACGACGGTAAAGTCGAAGAATATTAAAGAAAAGACAAAATGGAAATTTGATTGCAAAAT…
>ZjSWEET6 TTCTAAAGTTAACATTGATATATACTATGCATTTTTTTTTTATGATTCTTTAATTGGAATCAATCTTCCCAATCTACATTTAATTTATATCTTTGTAATTTTTTCATTTCATTCTAATCTTTTGGATTAGGATCTTCCCATTAATCCAAGTTCTATCTGAACTATATTTTTTGTATTTGAACTATATTTTCTGTATCTCAAAGACAAGACATGTGACCACTAATACATTAATTGCAATAGAATGCTCTTCTCTTTTATACTACGAACTACCAATATTCCACTCTTATAAATTAAAAAAATAAAATAAAATTGAAGATTCATGACCAAATGCTTATCTCTCTCTCTCTCTCTCTCTCTCTCTCTCTCTCTCTCTCTCTTTCTCTCTCTTT…
>ZjSWEET7 TTCGACTATTTGGTGATGCAATCTTCTTACACAAAAGAAATTAAAATTCTAACATTAAGATATACCAGTTTCTATATTTAATACTCTTTCTAATACTATTTCTAACATGTGGACCCTGTTTTTGGTAAGTAAAAGGAACCACATAAACTGTACACTTGCGAATATACGATTTTTTTTTTTGGAAGCCAAAGCTGGCATATATATAGACTTGTTGGGTGAGATATATGGATAACCATAAAACAAGGTAGTTATTTCAAGATAATATCTGACTAGTTTTTCCTTTTTAGTCAAAATAGGAAACAGTTATAACATCGAAATCTGAATTGGAAACTAAGAAAACAAATGGCGACTAAATTCCTATGTACGAAGATTAAACTAGTAAAAAACAA…
>ZjSWEET8 TAGCTCAGCGGCACACTTTAGGCCGCGTGGGTGTTAAGCCGCTCTTTGGCAATTGTTCGAGGATTTTAAGGTTTTTTGTTTTTAAATTTTTAAGAGAAGCGGAGAAGGATTTTTTTTTTTTAATCTAAAAAAAAAAAGAAAAAAAAAGTGATGCATCTGACTCATAGCCTATAAAGCCGGTCGACCATTGGCAGTGGAGAAATGTTGCATACATTGTCAATAACATGTAATTGTTATGTGATTTGTTGGGTCCAAATATTGAAATGGCACTAGATTTTATTAATGTTGTTATTATAACCAAAGTTTTGTTTTAAAAATTATTATCATATGGGAATAGTGAGGATCCCCACTCACAATGTATGTGAAAATGTGGTGGTCCTAAAATTAAA…
>ZjSWEET9 TTTCATATTTTTACCGTTTTCCTTTTCTTTACATGTAAAAGATGGTTAACACAGATGCCGTTAGAACAGTTGTAGGGATCCTAGGTTAGTTTGTATTATCCTAATTCATTTCCTATAACTATTATATATAATTAAAGTTATTTGCATTTTTTTATATTTTTTAATTTCTTTATTGCTTTACTGTATTTATTTTCCCCTATTGCTTTACCAAGCTAGTGGATTTTTCTTTTTCTTTTTTTCTTTTTTGAAATCTATAGAAACAGTGAATAGAGATTTTGATTTTCTATTTTATATATCTTCTAAGGAATTTTTTTTATTTTTTTTATTTTTTTATTTTTTTTTTTGGGAAAAGTTTTTAAGAAAGCCAAATAAGCCATTTGGGGTTTACT…
>ZjSWEET10 ATATTATATTTTAACATTTATTTAGGATACTACTAAATATTATATCTTAATTTCTCATTGAAATCTCTTTTTGCAATGCACTATAAATTTTTGAAAATTTTCTCTCTTTATAAATACAATCATATATATATATATATATATATTTCTTATTTGGACAGGGGATTTAAATCATGAATAACCAGATTGTCTCCGCAAGAAAAGTACAAATTATAGTTAGGTGAAGATTCTTTTAGCCAATAACAATTATATATTTACTATTTAAATTTTGATTGCAAACATCCAAATGGGTAAATGATAAAAGAAAAAATAAAAAGAAGAAGAAGAAGAAGAAGATGTAGAGGCTTCTTTATTTAAAATAAAAGAGATCCATTAAATTTCAAATGAAAGC…
>ZjSWEET11 AAGCGCGTTTTGCAGCGTAATTTGGTTAATTATGCAATTCAGCACCCAAACCTAAGATTAATAAATTAAATTGTAATAATATAATATTAGCCCACCTATATACATATATCTCCCTAAATAGCTACAGAATATATAAGTATTAAAATGACCGAAAATGGAGCTGTACGGCAGATACCACACGTAGCATAAAGACAGTTTTAATTAATCAACAAACAGTACGTTTTTGTCTTAGAAATATCTGCCCTCCTAATTAAACCATTATAAAAATGGAACACTAAATGTTATACTAATCATAAGAAACACGGCTAAGCTAATCTTAATTATTCGAATCATGATGGATATGCATATAGTAAATCTTATCATCTTAAGTGGACCATATTCTAAAAGC…
>ZjSWEET12 CTTGAACTTTAGTAGAGCTCAAAGTACAGATTTCTGCACTATGCATATTAAATCCCCCCAAGGAAGAAACTTAATTGCTTAATTTGCTATTGAAACTTGCCTGATCATTGCTTATTATTCTGGAGGACGTGAATTAAAAGATATCATAGCAAAAGAAGAAAGGTCAAATTGCCTTTCATACCCAAAAAAAAAAAAAAAAAAAGGAAAAAATGATAATAATGATGAGAAGAAGATGATGAAATTGTTGTTTGAGACGGAAGAAAAGGCAGGTAATTTAGGGTCATTGTCGTTTTCAGTAGGTGGTGGATCTGAAATTTTCCAAAAATTATATAATATTTATGACCAACGAATCACGACAAGCTTTTCTTTGGGCCCACCTCGCCATATA…
>ZjSWEET13 TTTCCTTACCCTGCATTTGCATGAAAATAAATTTCCACAGTTTGAAGCTTCAACCCTTGACATATTCACACACACTAACTCTGAAAAATTTAATGATATCATTAATAAGAAAGATCAAATAAACCACAGCAGAGCTAAATAAATGATAATAAACATACCTGGCACGTTTTTTCTCCTGTTCACCCTTCATAGGTAGAAGACCTCCATCAAACACAAGAACAGGTTTGACACCATAATGCCGAAGAAGATTCACTCTATGCATGCAATACTCAATGTGCCTAGACATTGGACATGAAATAGATACAGATTATGTTTTACAGATCTCTGTAAGTAAACACTAGACTGACATATATAAGTTGTCAATTACAATTATGGCATATCCTCTAAA…
>ZjSWEET14 ATAAATTAAATGGTAATTATATAGAATATTAATTATTATCAGTAATAACAAATATAGGATTTTTTTTAATTTTTTTTAGAAAAAAAAGTTTTTACTTTTTGCCGAAATTTTTGGCCACTACTCCTTGACACGTGGCATAACCTAGGATTATACCGGTGAACCGGGTATTTTTCATGGGAATGGGATCTTTTGTCCCATTTTTGTGTCCCATGTCTATGTAACCAATAGATCAATGACACGTTATTTAAAATTAATTCTCAAATTTTGCTGTTAATTTCATCTGTCTGCTTGCCTATTTTTATTTTAAATTCTATACACTCAACTCTTTGGAACTTTGAAAGTCAGGTAGCCAATTCCCTGTAATTCCTCTTATTTTCGTAAATTTGAA…
>ZjSWEET15 TTCAGCCTCAGAACCTTGATGAACTTTATGGTTTGATGTGACATGTTGGCCCTTCCATTAGGACCAGGTCCCTCTTCCATTTACATATCCATCTTCTTTAACTCCAAATTTGGGGCAAAAATAATGATACAGGTTTTAATGTGCCAAAACCACATTAATTTCTTTTCTAAAAATAAATCCAAAACAAACAAGTGAATGTGAATTGAGAAACGTTGTCGAACCTCCAACCGTACGTTAAAATGTTCGATCACAAAAACTGTGATTTTTACACTAGTTTTTGCTATCCTCTATGCCTCCACCCGATAGAATTGAATACATGCTCTGTTAACATGGATAGCACTACTCAAACCAAGGAAGCTACCATATTTGTCTGACTTTTACACTAGTT…
>ZjSWEET16 TTTTGGGAAAAGTTTTTATGAAAGCCAAATAAGCCATTTGGGGTTTACTAAGTATTAAGGGAAACTTCACAAGAATGTAAAATGTTGAGGCACGTGAATTATCTATTTACTTAACCTATTTTATGATCAATGATTAATGATTTCAAATTTAAATTCTTAACCCTAATATCTAAAAATATATATATATATATATATATATATCTACTTTTATTTCATTAACCTAATTATAATACAATAGTAATCTAAAAGTTTTCTTCTTCGTTTTCATGCAGGAAATGTGATCTCTTTCGGGTTATTTCTCTCCCCATCGTAATTACTCTAATCTTTATGATCTCTCTGTAATTGTCATAATAAATAGGAGTTTATTAATGATTTTGATTATATATAT…
>ZjSWEET17 CAAAAAAAAANNNNNNNNNNNNNNNNNNNNNNNNNNNNNNNNNNNNNNNNNNNNNNNNNNNNNNNNNNNNNNNNNNNNNNNNNNNNNNNNNNNNNNNNNNNNNNNNNNNNNNNNNNNNNNNNNNNNNNNNNNNNNNNNNNNNNNNNNNNNNNNNNNNNNNNNNNNNNNNNNNNNNNNNNNNNNNNNNNNNNNNNNNNNNNNNNNNNNNNNNNNNNNNNNNNNNNNNNNNNNNNNNNNNNNNNNNNNNNNNNNNNNNNNNNNNNNNNNNNNNNNNNNNNNNNNNNNNNNNNNNNNNNNNNNNNNNNNNNNNNNNNNNNNNNNNNNNNNNNNNNNNNNNNNNNNNNNNNNNNNNNNNNNNNNNNNNNNNNNNNNNNNNNNNNNNNNNNNN…
>ZjSWEET18 ATAATAATAATAAAAATGAATCAAAACCCCATTTCATCATTTTATTGCATTATTCTCAGCAGATTCAGGAATCTTCGTGTTCTTATATCATTTTGATCGAAAAGTAAAATAAACTAGATTTCTAAATGCCAAAATAATAACAATAATCGAACATTATCATCCATGCAAAAAGTGCATTGCACAAGATAGTGATGATATCAATCATATTATTCAAAAGAGACGACATACGAAAAAAAAAAGTAGGTGAGGATAATGTGATCCTTGATGCAGTGCTCTATCGATTGCTTTGTGTTAAATCATGGCTCCTATACATAACCCCTTTTTTTTTAATTTGCCGGGTAGGAATAACGATAAAGGCAATTTTAACGTGCATATGACACTTTAAAAT…
>ZjSWEET19 ATCTTCACACATGACCAATTGAATGATTAAAAGATAAAAAGCGAATCAATGAAATATTGTATTAAATAGGGGAGAGAGTAGCACCTTTTAAGAGTAGAAATGTATTATAAGTAAAATATTAAAATTTAAAGCATTACAAGCACTACTCTTACCCGCATATTGGGCAATCACCAAACATGATAGAAATCCTAATGTTAGGGAAGATTAATGCATAATTCCACTAGTCTCCTAAAGCGTCTGAAATAGTAAATACAAGGCAAAATATTGATCTATTGCCTTGTAATAGTACTAACAAAAGGAGCCGGGACTAGATACAGTGAATTTGGTCGTTCATTCAACGCTTATAGTATATCAAAACAATACTCTGTTTTGGTTTTGTGTGAGCTGA…
