# Supplementary material for: Genome-wide identification and expression profile analysis of SWEET genes in Chinese jujube
Source: PeerJ. 2023 Jan 17;11:e14704. doi: 10.7717/peerj.14704 (PMC9854374; doi:10.7717/peerj.14704)
Supplement: Supplemental Information 6 [file peerj-11-14704-s006.xlsx]

## Sheet: Sheet3
Supplementary File 5 qRT-PCR primers for ZjSWEETs and reference genes
Gene name	Forward primer	Reverse primer
ZjACT	AGCCTTCCTGCCAACGAGT	TTGCTTCTCACCCTTGATGC
ZjSWEET1	AGAGCATCCCTTATGTATC	CAGTCCTGGTCTTCATTC
ZjSWEET2	ATGGCTTTGGTTCTGCTCTT	TTAACATGGTTGGGCTTTGA
ZjSWEET3	CAGTAGTGGCAACCAAGAGCG	GCAGAAACCCAGCCCCAT
ZjSWEET4	ACTGCCTACGCTCTCATCCG	GGTTTTCCTTGCTTCCATCTGT
ZjSWEET6	ATGGCGTATTACTCAAGGATTT	CGGTAGTAGTGCCTGTAGCG
ZjSWEET8	GCCGTCCTCCAGTTCATC	AAAATCCCAACAAAGGTAAGC
ZjSWEET11	TCGCAGCACCACTAAGCAT	TACGCCATAACAGAGCCACA
ZjSWEET12	CAATCATAGTAGGTGGGA	GCATAAACTCAACGCTTC
ZjSWEET13	TCTGTCACCGCTACCAAC	AAAGGACTGCCATACCAA
ZjSWEET15	CCTACGCTCTCATCCGTTT	TATTAGGGGACGCAAGAAAG
ZjSWEET18	AAGAAATGAATACCGTGTCCCA	GATAAGCCCCAAGCCGAA
