# Supplementary material for: Genome-wide identification and expression profile analysis of SWEET genes in Chinese jujube
Source: PeerJ. 2023 Jan 17;11:e14704. doi: 10.7717/peerj.14704 (PMC9854374; doi:10.7717/peerj.14704)
Supplement: Supplemental Information 7 [file peerj-11-14704-s007.xlsx]

## Sheet: Sheet2
Supplementary File 7 The raw data of Ct value used for qRT-PCR in Fig. 5
Linyilizao							Beijingjidanzao
fruit development period	Biological replicate	Ct value					fruit development period	Biological replicate	Ct value
		Actin	ZjSWEET1						Actin	ZjSWEET1
Y	Rep-1	18.76	31.87				Y	Rep-1	20.09	33.6
Y	Rep-2	19.42	32.88				Y	Rep-2	20.35	34.12
Y	Rep-3	18.85	32.57				Y	Rep-3	19.83	33.61
EWM	Rep-1	18.62	33.62				EWM	Rep-1	18.15	32.25
EWM	Rep-2	18.26	33.72				EWM	Rep-2	18.77	33.05
EWM	Rep-3	18.31	33.32				EWM	Rep-3	18.08	32.24
WM	Rep-1	19.01	31.94				WM	Rep-1	18.11	29.57
WM	Rep-2	19.79	31.78				WM	Rep-2	18.71	29.98
WM	Rep-3	18.52	30.78				WM	Rep-3	18.41	29.93
HR	Rep-1	18.9	34.23				HR	Rep-1	18.33	33.01
HR	Rep-2	17.75	33.25				HR	Rep-2	19	33.8
HR	Rep-3	19.31	34.85				HR	Rep-3	18.92	33.38
FR	Rep-1	20.68	32.39				FR	Rep-1	18.06	31.75
FR	Rep-2	20.77	32.74				FR	Rep-2	18.09	31.96
FR	Rep-3	20.82	32.72				FR	Rep-3	19.05	32.52
		Actin	ZjSWEET2						Actin	ZjSWEET2
Y	Rep-1	19.46	26.07				Y	Rep-1	19.08	26.44
Y	Rep-2	19.39	26.03				Y	Rep-2	20.28	27.28
Y	Rep-3	19.51	26.08				Y	Rep-3	19.45	26.44
EWM	Rep-1	19.03	31.11				EWM	Rep-1	19.08	29.09
EWM	Rep-2	19.02	30.43				EWM	Rep-2	19.98	30.01
EWM	Rep-3	18.68	30.01				EWM	Rep-3	19.01	29.08
WM	Rep-1	19.62	28.56				WM	Rep-1	19.48	27.82
WM	Rep-2	20.36	29.2				WM	Rep-2	19.09	27.17
WM	Rep-3	19.43	28.51				WM	Rep-3	19.27	27.03
HR	Rep-1	18.18	26.7				HR	Rep-1	18.51	26.8
HR	Rep-2	17.05	25.96				HR	Rep-2	18.25	26.23
HR	Rep-3	18.08	26.66				HR	Rep-3	18.33	26.26
FR	Rep-1	19.02	25.63				FR	Rep-1	19.21	25.89
FR	Rep-2	18.94	25.35				FR	Rep-2	19.61	26.54
FR	Rep-3	20.1	26.55				FR	Rep-3	19.18	25.95
		Actin	ZjSWEET4						Actin	ZjSWEET4
Y	Rep-1	19.69	29.38				Y	Rep-1	21.87	30.04
Y	Rep-2	18.75	28.27				Y	Rep-2	22.34	30.72
Y	Rep-3	18.62	28.1				Y	Rep-3	22.1	30.13
EWM	Rep-1	18.34	27.15				EWM	Rep-1	19.39	28.72
EWM	Rep-2	18.23	27.38				EWM	Rep-2	19.98	29.55
EWM	Rep-3	18.18	27.29				EWM	Rep-3	19.12	28.68
WM	Rep-1	18.88	29.59				WM	Rep-1	18.17	28.03
WM	Rep-2	18.85	29.19				WM	Rep-2	18.7	28.2
WM	Rep-3	18.7	29.27				WM	Rep-3	18.56	27.83
HR	Rep-1	22.79	31.8				HR	Rep-1	18.32	26.82
HR	Rep-2	20.15	29.17				HR	Rep-2	18.71	27.15
HR	Rep-3	19.32	28.51				HR	Rep-3	18.67	27.26
FR	Rep-1	20.02	28.99				FR	Rep-1	19.4	26.55
FR	Rep-2	20.03	29.31				FR	Rep-2	19.35	26.79
FR	Rep-3	20.05	29.14				FR	Rep-3	19.84	27.22
		Actin	ZjSWEET6						Actin	ZjSWEET6
Y	Rep-1	19.75	22.74				Y	Rep-1	20.99	24.28
Y	Rep-2	19.66	22.52				Y	Rep-2	20.47	23.62
Y	Rep-3	19.86	22.98				Y	Rep-3	20.08	23.36
EWM	Rep-1	19.02	23.83				EWM	Rep-1	19.04	22.22
EWM	Rep-2	19.39	24.22				EWM	Rep-2	19.89	23.04
EWM	Rep-3	18.28	23.33				EWM	Rep-3	19.36	22.73
WM	Rep-1	19.06	21.99				WM	Rep-1	19.33	22.75
WM	Rep-2	19.39	22.27				WM	Rep-2	19.69	23.36
WM	Rep-3	19.31	22.08				WM	Rep-3	19.22	23.04
HR	Rep-1	19.24	26.09				HR	Rep-1	18.58	25.45
HR	Rep-2	18.4	26.04				HR	Rep-2	18.71	25.43
HR	Rep-3	18.88	26.59				HR	Rep-3	18.39	24.99
FR	Rep-1	20.89	28.97				FR	Rep-1	19.91	25.47
FR	Rep-2	20.21	28.08				FR	Rep-2	18.99	25.38
FR	Rep-3	22.51	29.8				FR	Rep-3	19.16	25.59
		Actin	ZjSWEET8						Actin	ZjSWEET8
Y	Rep-1	19.21	28.97				Y	Rep-1	22.07	30.54
Y	Rep-2	19.03	28.75				Y	Rep-2	22.87	31.3
Y	Rep-3	18.74	28.44				Y	Rep-3	22.52	30.81
EWM	Rep-1	19.27	31.78				EWM	Rep-1	18.92	32.34
EWM	Rep-2	18.72	21.27				EWM	Rep-2	18.93	32.09
EWM	Rep-3	18.53	30.86				EWM	Rep-3	18.67	32.19
WM	Rep-1	20.73	30.06				WM	Rep-1	19.28	29.61
WM	Rep-2	20.69	30.11				WM	Rep-2	19.2	29.81
WM	Rep-3	20.13	29.36				WM	Rep-3	19.33	29.71
HR	Rep-1	20.21	30.01				HR	Rep-1	18.48	27.96
HR	Rep-2	19.28	28.84				HR	Rep-2	18.26	27.55
HR	Rep-3	21.09	30.69				HR	Rep-3	19.04	28.2
FR	Rep-1	19.35	30.47				FR	Rep-1	18.27	27.13
FR	Rep-2	19.7	30.53				FR	Rep-2	18.36	27.23
FR	Rep-3	20.08	31.21				FR	Rep-3	18.45	27.09
		Actin	ZjSWEET11						Actin	ZjSWEET11
Y	Rep-1	20.43	25.89				Y	Rep-1	19.06	22.9
Y	Rep-2	21.05	25.67				Y	Rep-2	19.51	23.41
Y	Rep-3	20.13	25.93				Y	Rep-3	18.68	22.52
EWM	Rep-1	18.91	24.5				EWM	Rep-1	18.06	21.98
EWM	Rep-2	18.78	24.42				EWM	Rep-2	19.55	23.78
EWM	Rep-3	18.6	23.99				EWM	Rep-3	18.9	23.04
WM	Rep-1	18.94	22.51				WM	Rep-1	18.49	21.56
WM	Rep-2	19.21	25.87				WM	Rep-2	18.39	21.74
WM	Rep-3	19.21	22.75				WM	Rep-3	18.1	21.29
HR	Rep-1	19.33	22.91				HR	Rep-1	23.2	25.51
HR	Rep-2	18.54	22.47				HR	Rep-2	23.3	25.72
HR	Rep-3	19.42	23.12				HR	Rep-3	23.17	25.6
FR	Rep-1	19.21	22.39				FR	Rep-1	19.23	21.07
FR	Rep-2	20.56	23.9				FR	Rep-2	19.22	21.35
FR	Rep-3	18.7	22.19				FR	Rep-3	19.35	21.26
		Actin	ZjSWEET12						Actin	ZjSWEET12
Y	Rep-1	19.46	27.07				Y	Rep-1	20.71	29.41
Y	Rep-2	19.39	27.03				Y	Rep-2	20.28	29.28
Y	Rep-3	19.51	27.08				Y	Rep-3	20.45	29.44
EWM	Rep-1	18.53	33.86				EWM	Rep-1	18.09	34.04
EWM	Rep-2	18.47	33.81				EWM	Rep-2	18.67	34.62
EWM	Rep-3	18.26	33.75				EWM	Rep-3	17.67	34.26
WM	Rep-1	18.15	32.15				WM	Rep-1	19.38	31.99
WM	Rep-2	19.34	33.6				WM	Rep-2	19.19	32.02
WM	Rep-3	18.54	33.24				WM	Rep-3	18.87	31.93
HR	Rep-1	19.51	29.08				HR	Rep-1	17.9	29.02
HR	Rep-2	18.78	28.18				HR	Rep-2	18.16	29.09
HR	Rep-3	19.01	28.45				HR	Rep-3	18.05	29.12
FR	Rep-1	19.82	28.98				FR	Rep-1	18.76	28.28
FR	Rep-2	20.17	29.7				FR	Rep-2	19	28.45
FR	Rep-3	21.02	30.07				FR	Rep-3	19.24	29.05
		Actin	ZjSWEET13						Actin	ZjSWEET13
Y	Rep-1	19.57	25.66				Y	Rep-1	22.1	29.76
Y	Rep-2	19.29	25.13				Y	Rep-2	22.22	30.1
Y	Rep-3	19.41	25.41				Y	Rep-3	21.45	29.1
EWM	Rep-1	19.15	24.97				EWM	Rep-1	18.97	25.51
EWM	Rep-2	19.01	24.58				EWM	Rep-2	18.89	25.13
EWM	Rep-3	23.82	18.15				EWM	Rep-3	18.96	25.33
WM	Rep-1	19.56	23.85				WM	Rep-1	18.65	24.38
WM	Rep-2	20.21	24.22				WM	Rep-2	19.07	24.52
WM	Rep-3	19.06	23.09				WM	Rep-3	19.22	24.87
HR	Rep-1	18.83	28.11				HR	Rep-1	18.17	27.08
HR	Rep-2	18.11	27.49				HR	Rep-2	18.79	27.17
HR	Rep-3	19.52	28.73				HR	Rep-3	18.75	27.61
FR	Rep-1	19.65	28.58				FR	Rep-1	18.59	26.82
FR	Rep-2	20.57	29.97				FR	Rep-2	19.03	27.25
FR	Rep-3	20.93	30.06				FR	Rep-3	18.84	26.86
		Actin	ZjSWEET15						Actin	ZjSWEET15
Y	Rep-1	17.84	24.46				Y	Rep-1	19.15	26.56
Y	Rep-2	17.5	24.02				Y	Rep-2	18.03	25.56
Y	Rep-3	17.48	24.12				Y	Rep-3	17.99	25.56
EWM	Rep-1	19.06	28.4				EWM	Rep-1	19.03	28.15
EWM	Rep-2	18.96	29.14				EWM	Rep-2	19.54	29
EWM	Rep-3	19.01	28.69				EWM	Rep-3	19.67	28.86
WM	Rep-1	19.28	25.94				WM	Rep-1	20.75	33.1
WM	Rep-2	20.56	27.47				WM	Rep-2	20.13	32.21
WM	Rep-3	19.41	26.38				WM	Rep-3	19.87	31.5
HR	Rep-1	20.8	27.77				HR	Rep-1	17.81	24.73
HR	Rep-2	20.15	27.21				HR	Rep-2	18.04	24.93
HR	Rep-3	19.26	26.33				HR	Rep-3	18.18	24.94
FR	Rep-1	20.27	26.91				FR	Rep-1	19.23	26.39
FR	Rep-2	20.1	26.89				FR	Rep-2	18.55	25.98
FR	Rep-3	20.09	26.93				FR	Rep-3	18.84	26.08
		Actin	ZjSWEET18						Actin	ZjSWEET18
Y	Rep-1	18.42	22.91				Y	Rep-1	20.86	24.72
Y	Rep-2	18.63	23.06				Y	Rep-2	20.13	24.12
Y	Rep-3	18.72	23.16				Y	Rep-3	19.66	23.33
EWM	Rep-1	18.57	25.59				EWM	Rep-1	17.96	24.84
EWM	Rep-2	18.08	25.19				EWM	Rep-2	19.38	26.24
EWM	Rep-3	18.53	25.78				EWM	Rep-3	18.62	25.68
WM	Rep-1	18.07	22.25				WM	Rep-1	18.33	21.25
WM	Rep-2	18.34	22.28				WM	Rep-2	19.12	21.86
WM	Rep-3	18.22	22.38				WM	Rep-3	18.36	21.3
HR	Rep-1	18.64	22.1				HR	Rep-1	20.88	21.96
HR	Rep-2	18.28	22.09				HR	Rep-2	20.53	21.59
HR	Rep-3	18.8	22.31				HR	Rep-3	20.42	21.38
FR	Rep-1	19.06	22.04				FR	Rep-1	18.91	20.09
FR	Rep-2	19.24	22.18				FR	Rep-2	18.87	20.21
FR	Rep-3	19.56	22.28				FR	Rep-3	19.06	20.09
