# Supplementary material for: Genome-wide identification and expression profile analysis of SWEET genes in Chinese jujube
Source: PeerJ. 2023 Jan 17;11:e14704. doi: 10.7717/peerj.14704 (PMC9854374; doi:10.7717/peerj.14704)
Supplement: Supplemental Information 8 [file peerj-11-14704-s008.xlsx]

## Sheet: Sheet1
Supplementary File 8 The raw data of Ct value used for qRT-PCR in Fig 6
Low-temperature							Alkali						Salt
	Biological replicate	Ct value						Biological replicate	Ct value					Biological replicate	Ct value
		ZjSWEET1	Actin						ZjSWEET1	Actin					ZjSWEET1	Actin
0h	CK-1	31.35	25.12				0h	CK-1	30.52	21.82			0h	CK-1	32.56	22.28
	CK-2	32.85	26.08					CK-2	30.74	21.19				CK-2	32.78	22.56
	CK-3	32.35	25.46					CK-3	30.24	21.46				CK-3	32.17	21.93
1h	CK-1	31.91	25.1				1h	CK-1	31.71	22.66			1h	CK-1	33.75	23.47
	CK-2	31.78	25.37					CK-2	31.54	22.16				CK-2	33.45	23.12
	CK-3	31.47	25.33					CK-3	31.02	21.7				CK-3	33.88	23.56
	Rep-1	35.19	26.87					Rep-1	31.23	23.04				Rep-1	33.21	22.89
	Rep-2	34.7	26.6					Rep-2	30.23	21.97				Rep-2	33.58	23.51
	Rep-3	32.97	24.49					Rep-3	31.53	22.97				Rep-3	32.97	22.67
6h	CK-1	31.62	25.29				6h	CK-1	31.96	22.87			6h	CK-1	32.43	22.7
	CK-2	32.25	25.6					CK-2	31.81	22.52				CK-2	32.38	22.72
	CK-3	31.79	25.11					CK-3	32.3	22.94				CK-3	31.85	22.43
	Rep-1	34.4	22.42					Rep-1	30.79	22.12				Rep-1	31.52	21.99
	Rep-2	37.75	25.88					Rep-2	31.3	22.7				Rep-2	32.36	22.74
	Rep-3	37.52	25.74					Rep-3	32.23	23.39				Rep-3	32.5	23.18
24h	CK-1	30.48	24.03				24h	CK-1	31.73	22.37			24h	CK-1	32.28	22.86
	CK-2	31.04	24.01					CK-2	32.06	22.6				CK-2	32.03	22.79
	CK-3	30.05	23.09					CK-3	30.53	20.92				CK-3	31.79	22.54
	Rep-1	34.27	24.73					Rep-1	31.61	22.31				Rep-1	32.03	22.55
	Rep-2	34.82	24.84					Rep-2	31.54	22.32				Rep-2	32.79	23.21
	Rep-3	35.49	25.95					Rep-3	31.79	22.56				Rep-3	32.05	22.4
		ZjSWEET2	Actin						ZjSWEET2	Actin					ZjSWEET2	Actin
0h	CK-1	28.12	24.25				0h	CK-1	25.08	22.15			0h	CK-1	26.32	22.15
	CK-2	28.64	24.43					CK-2	25.32	21.89				CK-2	26.26	22.38
	CK-3	28.73	24.65					CK-3	25.05	21.78				CK-3	26.68	22.49
1h	CK-1	29.05	24.72				1h	CK-1	25.23	21.97			1h	CK-1	27.32	23.4
	CK-2	28.84	24.81					CK-2	25.87	22.35				CK-2	26.72	22.28
	CK-3	28.62	24.46					CK-3	25.46	22.14				CK-3	27.47	23.52
	Rep-1	28.77	26.75					Rep-1	26.45	22.45				Rep-1	25.65	22.58
	Rep-2	28.3	26.28					Rep-2	26.68	22.31				Rep-2	26.21	23.36
	Rep-3	27.03	24.83					Rep-3	26.98	22.78				Rep-3	26.05	23.34
6h	CK-1	25.8	22.24				6h	CK-1	26.08	22.69			6h	CK-1	26.09	22.49
	CK-2	26.65	22.96					CK-2	25.98	22.84				CK-2	25.68	22.14
	CK-3	26.23	22.69					CK-3	25.76	22.46				CK-3	25.9	22.15
	Rep-1	28.12	25.1					Rep-1	26.48	21.97				Rep-1	26.13	22.27
	Rep-2	29.08	26.21					Rep-2	26.67	21.65				Rep-2	25.21	21.34
	Rep-3	29.75	26.64					Rep-3	26.34	21.74				Rep-3	26.84	23.07
24h	CK-1	27.91	24.48				24h	CK-1	25.85	22.32			24h	CK-1	26.5	21.91
	CK-2	27.89	24.63					CK-2	25.34	22.15				CK-2	26.96	22.57
	CK-3	27.08	23.59					CK-3	25.46	22.05				CK-3	26.33	22.01
	Rep-1	29.35	25.98					Rep-1	26.24	21.84				Rep-1	27.34	22.61
	Rep-2	29.19	25.81					Rep-2	26.57	22.08				Rep-2	27.39	23.12
	Rep-3	29.78	25.53					Rep-3	26.38	22.26				Rep-3	27.02	22.36
		ZjSWEET4	Actin						ZjSWEET4	Actin					ZjSWEET4	Actin
0h	CK-1	27.62	21.84				0h	CK-1	28	22.31			0h	CK-1	27.95	22.15
	CK-2	27.45	21.49					CK-2	28.31	22.15				CK-2	28.4	22.35
	CK-3	27.8	21.65					CK-3	28.08	22.02				CK-3	28.15	22.42
1h	CK-1	27.84	21.65				1h	CK-1	28.05	21.95			1h	CK-1	28.03	22.01
	CK-2	27.31	21.48					CK-2	27.96	21.85				CK-2	28.26	22.28
	CK-3	28.02	21.87					CK-3	27.68	21.67				CK-3	28.35	22.3
	Rep-1	26.69	21.97					Rep-1	28.45	22.01				Rep-1	28	22.1
	Rep-2	26.32	21.78					Rep-2	28.07	21.78				Rep-2	28.24	22.48
	Rep-3	26.45	21.57					Rep-3	28.26	21.95				Rep-3	27.91	22.04
6h	CK-1	28.13	22.02				6h	CK-1	28.03	21.85			6h	CK-1	28.12	21.95
	CK-2	28.33	21.85					CK-2	27.76	21.62				CK-2	28.45	22.26
	CK-3	27.95	21.74					CK-3	27.83	21.51				CK-3	28.85	22.4
	Rep-1	27	21.68					Rep-1	28.52	21.78				Rep-1	28.13	22.24
	Rep-2	27.35	21.74					Rep-2	28.74	22.15				Rep-2	28.43	22.5
	Rep-3	27.45	22					Rep-3	29.32	22.35				Rep-3	27.95	22.35
24h	CK-1	28.27	22.19				24h	CK-1	28.25	21.89			24h	CK-1	29.03	22.77
	CK-2	28.36	22.4					CK-2	28.64	22.15				CK-2	29.23	22.79
	CK-3	28.45	22.08					CK-3	28.96	22.34				CK-3	29.44	23.07
	Rep-1	28.12	21.85					Rep-1	29	21.79				Rep-1	29.14	23.23
	Rep-2	28	21.68					Rep-2	29.32	21.96				Rep-2	28.64	23.04
	Rep-3	28.34	22.02					Rep-3	29.05	22.08				Rep-3	29	23.39
		ZjSWEET6	Actin						ZjSWEET6	Actin					ZjSWEET6	Actin
0h	CK-1	27	22.63				0h	CK-1	26.14	22.03			0h	CK-1	32.08	24.15
	CK-2	27.32	22.94					CK-2	26.21	22.32				CK-2	32.46	24.65
	CK-3	27.1	22.79					CK-3	26	22.15				CK-3	32.73	24.48
1h	CK-1	27.83	23.18				1h	CK-1	26.19	22.21			1h	CK-1	32.06	24.48
	CK-2	27.49	23.01					CK-2	26.08	22.03				CK-2	32.46	24.28
	CK-3	27.28	22.84					CK-3	26.75	22.48				CK-3	33.05	24.36
	Rep-1	27.14	22.96					Rep-1	26.48	22.18				Rep-1	31.19	23.19
	Rep-2	27.07	23.15					Rep-2	26.37	22.34				Rep-2	32.07	24.15
	Rep-3	27.28	23.02					Rep-3	25.98	22.08				Rep-3	31.77	23.97
6h	CK-1	27.44	22.76				6h	CK-1	26.23	21.98			6h	CK-1	31.62	23.63
	CK-2	27.79	23.14					CK-2	26.05	22.04				CK-2	31.52	23.33
	CK-3	27.68	22.85					CK-3	26.33	22.35				CK-3	31.37	23.1
	Rep-1	27.05	23.01					Rep-1	25.72	21.86				Rep-1	31.08	22.98
	Rep-2	26.89	22.79					Rep-2	26.18	22.15				Rep-2	31.08	23.15
	Rep-3	26.65	22.94					Rep-3	26.34	22.26				Rep-3	30.91	23.54
24h	CK-1	27.54	23.02				24h	CK-1	25.94	21.85			24h	CK-1	31.66	23.48
	CK-2	27.46	22.76					CK-2	26.02	22.16				CK-2	31.72	23.46
	CK-3	27.05	22.58					CK-3	26.27	22.04				CK-3	31.87	23.68
	Rep-1	27.66	23.13					Rep-1	25.06	21.64				Rep-1	30.38	23.26
	Rep-2	27.22	22.84					Rep-2	25.39	22.08				Rep-2	30.41	23.41
	Rep-3	27.48	22.76					Rep-3	24.87	21.78				Rep-3	31.09	23.85
		ZjSWEET8	Actin						ZjSWEET8	Actin					ZjSWEET8	Actin
0h	CK-1	27.12	22.13				0h	CK-1	27.01	21.73			0h	CK-1	27.32	22.05
	CK-2	27.46	22.34					CK-2	26.84	21.68				CK-2	27.61	22.24
	CK-3	27	21.89					CK-3	26.49	21.57				CK-3	27.95	22.4
1h	CK-1	27.24	22.15				1h	CK-1	26.87	21.46			1h	CK-1	28.04	22.53
	CK-2	27.31	22.46					CK-2	26.72	21.37				CK-2	27.85	22.34
	CK-3	27	22.08					CK-3	26.21	21.08				CK-3	27.63	22.1
	Rep-1	27.65	21.94					Rep-1	24.51	21.75				Rep-1	27.24	22.19
	Rep-2	27.79	22.13					Rep-2	24.28	21.54				Rep-2	27.81	22.52
	Rep-3	27.84	22.4					Rep-3	24.43	21.6				Rep-3	27.34	22.36
6h	CK-1	27.19	22.16				6h	CK-1	27.23	21.84			6h	CK-1	28.49	22.81
	CK-2	27.49	22.17					CK-2	27.01	21.74				CK-2	28.04	22.37
	CK-3	27.75	22.46					CK-3	27.25	21.91				CK-3	27.83	22.48
	Rep-1	27.94	22.34					Rep-1	25.41	21.87				Rep-1	26.34	22.18
	Rep-2	28.13	22.18					Rep-2	25.48	21.85				Rep-2	26.21	21.86
	Rep-3	27.75	22.13					Rep-3	25.67	21.7				Rep-3	27.05	22.4
24h	CK-1	27.83	22.43				24h	CK-1	26.81	21.35			24h	CK-1	28.03	22.34
	CK-2	27.84	22.16					CK-2	26.98	21.4				CK-2	27.5	21.95
	CK-3	28	22.34					CK-3	27.08	21.78				CK-3	27.92	22.08
	Rep-1	29.14	22.24					Rep-1	27.02	21.75				Rep-1	25.52	22.15
	Rep-2	29.24	22.13					Rep-2	26.89	21.6				Rep-2	25.73	22.43
	Rep-3	29.43	22.41					Rep-3	26.96	21.84				Rep-3	25.87	22.09
		ZjSWEET11	Actin						ZjSWEET11	Actin					ZjSWEET11	Actin
0h	CK-1	27.58	22.98				0h	CK-1	26.88	22.23			0h	CK-1	27.25	22.65
	CK-2	27.28	23.06					CK-2	27.02	22.32				CK-2	27.45	22.55
	CK-3	27.15	22.89					CK-3	27.12	22.38				CK-3	27.36	22.41
1h	CK-1	26.72	22.21				1h	CK-1	27.23	22.32			1h	CK-1	26.76	22.12
	CK-2	26.85	22.35					CK-2	26.98	22.15				CK-2	26.58	21.86
	CK-3	26.89	22.61					CK-3	27.15	22.46				CK-3	26.94	22.29
	Rep-1	27.85	21.98					Rep-1	26.75	22.13				Rep-1	27.13	22.32
	Rep-2	27.98	22.18					Rep-2	26.61	21.86				Rep-2	26.86	22.15
	Rep-3	27.75	22.05					Rep-3	26.98	22.35				Rep-3	26.76	21.98
6h	CK-1	26.65	22.65				6h	CK-1	27.86	23.01			6h	CK-1	27.05	22.16
	CK-2	26.85	22.45					CK-2	28.02	22.85				CK-2	27.17	22.42
	CK-3	26.73	22.68					CK-3	28.38	23.22				CK-3	27.44	22.34
	Rep-1	32.39	24.41					Rep-1	27.08	22.34				Rep-1	27.25	22.41
	Rep-2	33.06	25.24					Rep-2	26.84	22.15				Rep-2	26.83	22.37
	Rep-3	32.81	24.65					Rep-3	27.19	22.48				Rep-3	27.04	22.15
24h	CK-1	28.16	23.24				24h	CK-1	27.31	22.12			24h	CK-1	26.94	22.05
	CK-2	27.95	23.12					CK-2	26.78	21.65				CK-2	27.54	22.34
	CK-3	27.25	22.05					CK-3	27.15	21.78				CK-3	27.35	22.46
	Rep-1	27.12	22.09					Rep-1	26.65	21.85				Rep-1	26.77	22.35
	Rep-2	26.97	22.14					Rep-2	26.78	22.12				Rep-2	27.01	22.45
	Rep-3	27.64	22.33					Rep-3	26.96	22.32				Rep-3	26.76	22.18
		ZjSWEET12	Actin						ZjSWEET12	Actin					ZjSWEET12	Actin
0h	CK-1	28.12	24.25				0h	CK-1	25.08	22.15			0h	CK-1	26.32	22.15
	CK-2	28.64	24.43					CK-2	25.32	21.89				CK-2	26.26	22.38
	CK-3	28.73	24.65					CK-3	25.05	21.78				CK-3	26.68	22.49
1h	CK-1	29.05	24.72				1h	CK-1	25.23	21.97			1h	CK-1	27.32	23.4
	CK-2	28.84	24.81					CK-2	25.87	22.35				CK-2	26.72	22.28
	CK-3	28.62	24.46					CK-3	25.46	22.14				CK-3	27.47	23.52
	Rep-1	28.77	26.75					Rep-1	26.45	22.45				Rep-1	25.65	22.58
	Rep-2	28.3	26.28					Rep-2	26.68	22.31				Rep-2	26.21	23.36
	Rep-3	27.03	24.83					Rep-3	26.98	22.78				Rep-3	26.05	23.34
6h	CK-1	25.8	22.24				6h	CK-1	26.08	22.69			6h	CK-1	26.09	22.49
	CK-2	26.65	22.96					CK-2	25.98	22.84				CK-2	25.68	22.14
	CK-3	26.23	22.69					CK-3	25.76	22.46				CK-3	25.9	22.15
	Rep-1	28.12	25.1					Rep-1	26.48	21.97				Rep-1	26.13	22.27
	Rep-2	29.08	26.21					Rep-2	26.67	21.65				Rep-2	25.21	21.34
	Rep-3	29.75	26.64					Rep-3	26.34	21.74				Rep-3	26.84	23.07
24h	CK-1	27.91	24.48				24h	CK-1	25.85	22.32			24h	CK-1	26.5	21.91
	CK-2	27.89	24.63					CK-2	25.34	22.15				CK-2	26.96	22.57
	CK-3	27.08	23.59					CK-3	25.46	22.05				CK-3	26.33	22.01
	Rep-1	29.35	25.98					Rep-1	26.24	21.84				Rep-1	27.34	22.61
	Rep-2	29.19	25.81					Rep-2	26.57	22.08				Rep-2	27.39	23.12
	Rep-3	29.78	25.53					Rep-3	26.38	22.26				Rep-3	27.02	22.36
		ZjSWEET13	Actin						ZjSWEET13	Actin					ZjSWEET13	Actin
0h	CK-1	27.13	20.35				0h	CK-1	27.02	20.67			0h	CK-1	26.43	21.64
	CK-2	26.89	20.64					CK-2	27.31	20.82				CK-2	26.84	22.47
	CK-3	27.23	20.87					CK-3	27.64	21.05				CK-3	26.61	22.13
1h	CK-1	27.83	21.05				1h	CK-1	26.53	20.34			1h	CK-1	26.75	21.87
	CK-2	27.34	20.84					CK-2	27.24	20.75				CK-2	26.63	22.11
	CK-3	27.08	20.38					CK-3	27.07	20.56				CK-3	26.12	21.34
	Rep-1	27.64	20.68					Rep-1	25.62	21.23				Rep-1	26.34	21.65
	Rep-2	27.15	20.43					Rep-2	24.97	20.85				Rep-2	26.02	21.31
	Rep-3	27.08	20.17					Rep-3	24.68	20.76				Rep-3	26.18	21.17
6h	CK-1	27.65	21.05				6h	CK-1	27.26	20.67			6h	CK-1	26.03	21.34
	CK-2	27.24	20.48					CK-2	27.11	20.34				CK-2	26.54	21.74
	CK-3	27.62	20.68					CK-3	27.62	20.76				CK-3	26.35	21.62
	Rep-1	28.42	20.65					Rep-1	26.24	20.18				Rep-1	27.12	22.05
	Rep-2	28.67	20.37					Rep-2	26.43	20.65				Rep-2	27.65	22.34
	Rep-3	28.34	20.46					Rep-3	25.83	20.37				Rep-3	26.94	21.86
24h	CK-1	28.01	21.13				24h	CK-1	27.58	20.78			24h	CK-1	27.02	22.21
	CK-2	27.82	20.74					CK-2	28.07	21.15				CK-2	26.77	21.84
	CK-3	27.66	20.64					CK-3	27.91	20.93				CK-3	26.54	21.64
	Rep-1	29.12	20.84					Rep-1	27.74	21.34				Rep-1	27.55	22.08
	Rep-2	28.64	20.34					Rep-2	26.91	20.79				Rep-2	26.84	21.89
	Rep-3	28.78	20.63					Rep-3	26.53	20.64				Rep-3	27.05	21.49
		ZjSWEET15	Actin						ZjSWEET15	Actin					ZjSWEET15	Actin
0h	CK-1	25.17	20.95				0h	CK-1	27.64	21.35			0h	CK-1	26.23	22.15
	CK-2	25.89	21.35					CK-2	27.34	21.64				CK-2	26.48	21.53
	CK-3	25.34	21.03					CK-3	27.49	21.05				CK-3	26.18	21.64
1h	CK-1	25.83	21.34				1h	CK-1	27.45	20.97			1h	CK-1	27.02	22.13
	CK-2	25.54	21.05					CK-2	27.64	21.35				CK-2	27.16	22.34
	CK-3	25.74	21.18					CK-3	28.05	21.68				CK-3	26.98	22.04
	Rep-1	27.24	21.84					Rep-1	28.85	22.05				Rep-1	28.06	21.98
	Rep-2	27.65	21.48					Rep-2	29	21.84				Rep-2	27.85	22.43
	Rep-3	27.18	22.04					Rep-3	28.76	21.61				Rep-3	27.94	22.31
6h	CK-1	26.24	21.86				6h	CK-1	27.85	21.49			6h	CK-1	26.85	21.78
	CK-2	26.45	22.04					CK-2	28.34	21.84				CK-2	27.44	22.65
	CK-3	26.34	21.67					CK-3	28	21.36				CK-3	27.03	22.16
	Rep-1	29.02	21.34					Rep-1	30.81	21.54				Rep-1	27.62	22.34
	Rep-2	28.79	21.18					Rep-2	31.02	21.35				Rep-2	28.01	22.25
	Rep-3	29.35	20.86					Rep-3	30.97	21.67				Rep-3	27.15	22.04
24h	CK-1	26.72	21.85				24h	CK-1	28.12	21.43			24h	CK-1	28.12	22.57
	CK-2	26.35	21.48					CK-2	28.74	21.67				CK-2	28.04	22.27
	CK-3	26.03	21.18					CK-3	29.05	21.94				CK-3	27.44	21.89
	Rep-1	28.12	22.01					Rep-1	29.37	21.46				Rep-1	28.07	22.16
	Rep-2	27.84	21.48					Rep-2	30.05	22.05				Rep-2	28.15	21.97
	Rep-3	27.95	21.75					Rep-3	29.64	21.76				Rep-3	27.46	21.78
		ZjSWEET18	Actin						ZjSWEET18	Actin					ZjSWEET18	Actin
0h	CK-1	26.36	23.06				0h	CK-1	27.42	23.78			0h	CK-1	26.65	22.56
	CK-2	26.28	23.02					CK-2	27.58	23.87				CK-2	26.32	22.46
	CK-3	26.13	22.95					CK-3	27.51	23.92				CK-3	26.45	22.49
1h	CK-1	26.58	23.23				1h	CK-1	27.21	23.5			1h	CK-1	27.21	22.96
	CK-2	26.48	23.32					CK-2	27.36	23.63				CK-2	27.08	22.87
	CK-3	26.61	23.26					CK-3	27.28	23.58				CK-3	26.75	22.84
	Rep-1	28.25	22.65					Rep-1	29.19	24.12				Rep-1	25.42	22.35
	Rep-2	28.28	22.88					Rep-2	28.98	24.23				Rep-2	25.94	22.05
	Rep-3	28.43	22.75					Rep-3	29.13	24.18				Rep-3	25.35	22.15
6h	CK-1	25.89	22.32				6h	CK-1	27.35	23.12			6h	CK-1	26.55	22.52
	CK-2	25.82	22.25					CK-2	27.15	23.25				CK-2	26.92	22.86
	CK-3	25.79	22.31					CK-3	27.25	23.18				CK-3	26.75	22.58
	Rep-1	26.23	22.65					Rep-1	27.35	23.12				Rep-1	26.09	22.52
	Rep-2	26.12	22.59					Rep-2	27.28	23.05				Rep-2	25.75	21.98
	Rep-3	26.18	22.46					Rep-3	27.45	23.35				Rep-3	26.36	22.78
24h	CK-1	26.59	22.98				24h	CK-1	26.95	23.15			24h	CK-1	26.95	23.02
	CK-2	26.77	23.09					CK-2	27.16	23.28				CK-2	27.05	22.95
	CK-3	26.75	23.02					CK-3	27.35	23.32				CK-3	27.09	22.85
	Rep-1	26.81	23.02					Rep-1	27.57	23.69				Rep-1	27.08	23.25
	Rep-2	26.15	22.74					Rep-2	27.93	23.85				Rep-2	26.86	23.08
	Rep-3	26.62	22.98					Rep-3	27.55	23.78				Rep-3	27.08	22.98

## Sheet: Sheet2
Low-temperature						Alkali						Salt
	CK	1h	6h	24h			CK	1h	6h	24h			CK	1h	6h	24h
ZjSWEET1	1	**	**	**		ZjSWEET1	1	**	**	*		ZjSWEET1	1			*
ZjSWEET2	1	**	**	*		ZjSWEET2	1	**	**	**		ZjSWEET2	1	**	*
ZjSWEET4	1	**	**	*		ZjSWEET4	1	**	**	**		ZjSWEET4	1		**	**
ZjSWEET6	1	**	**			ZjSWEET6	1			**		ZjSWEET6	1		**	**
ZjSWEET8	1	**	**	**		ZjSWEET8	1	**	**	*		ZjSWEET8	1	**	**	**
ZjSWEET11	1	**	**			ZjSWEET11	1		*	**		ZjSWEET11	1		*	**
ZjSWEET12	1	**	**	*		ZjSWEET12	1	*	**	**		ZjSWEET12	1	**	**	**
ZjSWEET13	1		**	**		ZjSWEET13	1	**	**	**		ZjSWEET13	1		**	**
ZjSWEET15	1	**	**	**		ZjSWEET15	1	**	**	**		ZjSWEET15	1	**	**	**
ZjSWEET18	1	**				ZjSWEET18	1	**	*			ZjSWEET18	1	**	**	*
*significantly(P<0.05), ** extremely significant(P<0.01)
All processed data were compared with CK.
All statistical analyses were performed with SPSS software 17.0 using t-test method.
